# Supplementary material for: Difluorocarbene-derived trifluoromethylselenolation of benzyl halides
Source: Royal Society of Chemistry journal article supplement (doi:10.1039/c8cc09719d), 2019-01-01

## Supporting Information

### Difluorocarbene-derived trifluoromethylselenolation of benzyl halides

Xin-Lei Chen<sup>ab</sup>, Sheng-Hua Zhou<sup>b</sup>, Jin-Hong Lin<sup>b</sup>, Qing-Hai Deng<sup>a\*</sup>, Ji-Chang Xiao<sup>b\*</sup>

<sup>a</sup>College of Chemistry and Materials Science, Shanghai Normal University, 100 Guilin Road, Shanghai, 200234, China; E-mail: qinghaideng@shnu.edu.cn, Tel: +86-21-64321305.

<sup>b</sup>Key Laboratory of Organofluorine Chemistry, Shanghai Institute of Organic Chemistry, University of Chinese Academy of Sciences, Chinese Academy of Sciences, 345 Lingling Road, Shanghai 200032, China. E-mail: jchxiao@sioc.ac.cn, Tel: +86-21-54925340

#### Content

|                                                                                             |     |
|---------------------------------------------------------------------------------------------|-----|
| 1. General information .....                                                                | S2  |
| 2. Procedure for the preparation of <b>2</b> .....                                          | S2  |
| 3. The observation of [CuSeCF <sub>3</sub> ] intermediate.....                              | S6  |
| 4. References .....                                                                         | S9  |
| 5. Copies of <sup>19</sup> F NMR, <sup>1</sup> H NMR, and <sup>13</sup> C NMR spectra ..... | S10 |

## 1. General information

Solvents and reagents were purchased from commercial sources and used as received unless otherwise noted.  $^1\text{H}$ ,  $^{13}\text{C}$  and  $^{19}\text{F}$  NMR spectra were detected on a 500 MHz, 400MHz or 300 MHz NMR spectrometer. Data for  $^1\text{H}$  NMR,  $^{13}\text{C}$  NMR and  $^{19}\text{F}$  NMR were recorded as follows: chemical shift ( $\delta$ , ppm), multiplicity (s = singlet, d = doublet, t = triplet, m = multiplet, q = quartet, coupling constant ( $J$ ) in Hz). Mass spectra were obtained on a GC-MS or LC-MS. High resolution mass data were recorded on a high resolution mass spectrometer in the EI mode.

## 2. Procedure for the preparation of 2

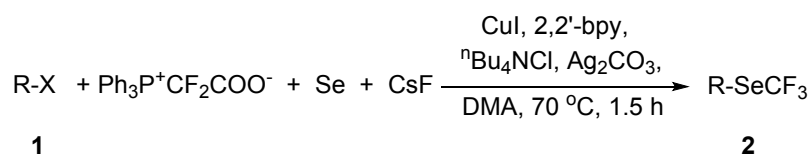

Into a 10 mL sealed tube were added **1a** (0.2 mmol, 49.4mg),  $\text{Ph}_3\text{P}^+\text{CF}_2\text{COO}^-$  (0.4 mmol, 142.4 mg), Se (1.2 mmol, 94.8 mg), CsF (0.6 mmol, 91.2 mg), CuI (0.6 mmol, 114.3 mg), 2,2'-bpy (0.4 mmol, 62.4 mg),  $^n\text{Bu}_4\text{NCl}$  (0.4 mmol, 111 mg),  $\text{Ag}_2\text{CO}_3$  (0.04 mmol, 11.1 mg) and DMA (3 mL) under a  $\text{N}_2$  atmosphere. The tube was sealed and the mixture was stirred at 70  $^\circ\text{C}$  for 1.5 h. After being cooled to room temperature, the mixture was filtrated. The solid was washed by DCM, and the combined organic phase was washed with water (20 mL  $\times$  3) to remove DMA. The organic phase was dried over  $\text{Na}_2\text{SO}_4$ . After the solvent was removed by concentration, the residue was subjected to flash column chromatography to afford the final product **2a**.

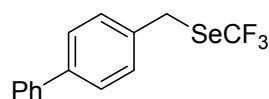

**2a**

([1,1'-biphenyl]-4-ylmethyl) (trifluoromethyl) selenane; 71%; white solid; M. P.: 65  $^\circ\text{C}$ ;  $^1\text{H}$  NMR (400 MHz,  $\text{CDCl}_3$ )  $\delta$  7.58-7.54 (m, 4H), 7.45-7.39 (m, 4H), 7.34 (t,  $J$  = 6.8Hz, 1H), 4.28 (s, 2H).  $^{19}\text{F}$  NMR (376 MHz,  $\text{CDCl}_3$ )  $\delta$  -34.41 (s, 3F).  $^{13}\text{C}$  NMR (101 MHz,  $\text{CDCl}_3$ )  $\delta$  140.8 (s), 140.5 (s), 135.1 (s), 130.6 (s), 129.5 (s), 128.8(s), 127.6 (s), 127.1 (s), 122.9 (q,  $J$  = 331.0 Hz), 28.9 (q,  $J$  = 1.3 Hz). IR (neat)  $\nu$  = 1488, 1407, 1191, 1103, 842, 765, 738, 728, 662 $\text{cm}^{-1}$ ; HRMS (EI) Calcd for  $\text{C}_{14}\text{H}_{11}\text{F}_3^{74}\text{Se}[\text{M}]^+$ : 310.0038, Found: 310.0051.

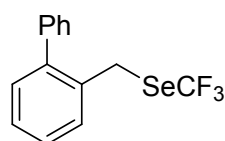

**2b**

([1,1'-biphenyl]-2-ylmethyl) (trifluoromethyl) selane; 41%; yellow liquid;  $^1\text{H}$  NMR (400 MHz,  $\text{CDCl}_3$ )  $\delta$  7.45-7.38 (m, 4H), 7.34-7.31 (m, 4H), 7.24 (t,  $J = 4.4$  Hz, 1H), 4.20 (s, 2H).  $^{19}\text{F}$  NMR (376 MHz,  $\text{CDCl}_3$ )  $\delta$  -34.75 (s, 3F).  $^{13}\text{C}$  NMR (101 MHz,  $\text{CDCl}_3$ )  $\delta$  142.4 (s), 140.3 (s), 133.4 (s), 130.6 (s), 130.3 (s), 129.0 (s), 128.4 (s), 127.93 (s), 127.90 (s), 127.6 (s), 122.9 (q,  $J = 331.0$  Hz), 27.3 (q,  $J = 1.7$  Hz). IR (neat)  $\nu = 3062, 1478, 1451, 1438, 1099, 762, 744, 702\text{cm}^{-1}$ ; HRMS (EI) Calcd for  $\text{C}_{14}\text{H}_{11}\text{F}_3^{74}\text{Se}[\text{M}]^+$ : 310.0038, Found: 310.0045.

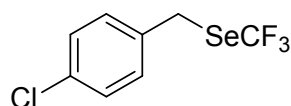

**2c**

(4-chlorobenzyl) (trifluoromethyl) selane; 57%; slightly yellow liquid;  $^1\text{H}$  NMR (400 MHz,  $\text{CDCl}_3$ )  $\delta$  7.30-7.24 (m, 4H), 4.18 (s, 2H).  $^{19}\text{F}$  NMR (376 MHz,  $\text{CDCl}_3$ )  $\delta$  -34.37 (s, 3F).  $^{13}\text{C}$  NMR (101 MHz,  $\text{CDCl}_3$ )  $\delta$  134.8 (s), 133.7 (s), 130.3 (s), 129.1 (s), 122.7 (q,  $J = 331.4$  Hz), 28.3 (q,  $J = 1.8$  Hz). IR (neat)  $\nu = 2962, 1492, 1408, 1261, 1095, 864, 800, 739, 704\text{cm}^{-1}$ ; HRMS (EI) Calcd for  $\text{C}_8\text{H}_6\text{ClF}_3^{74}\text{Se}[\text{M}]^+$ : 267.9335, Found: 267.9330.

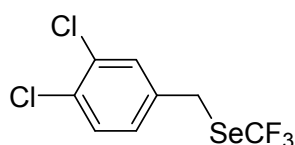

**2d**

(3,4-dichlorobenzyl) (trifluoromethyl) selane; 55%; slightly yellow liquid;  $^1\text{H}$  NMR (400 MHz,  $\text{CDCl}_3$ )  $\delta$  7.42 (d,  $J = 2.1$  Hz, 1H), 7.38 (d,  $J = 8.3$  Hz, 1H), 7.16 (dd,  $J = 8.2, 2.1$  Hz, 1H), 4.14 (s, 2H).  $^{19}\text{F}$  NMR (376 MHz,  $\text{CDCl}_3$ )  $\delta$  -34.29 (s, 3F).  $^{13}\text{C}$  NMR (101 MHz,  $\text{CDCl}_3$ )  $\delta$  136.7 (s), 132.9 (s), 132.0 (s), 130.9 (s), 130.8 (s), 128.3 (s), 122.6 (q,  $J = 331.5$  Hz), 27.7 (q,  $J = 1.8$  Hz). IR (neat)  $\nu = 1593, 1470, 1396, 1201, 1096, 1073, 1034, 891, 738\text{cm}^{-1}$ ; HRMS (EI) Calcd for  $\text{C}_8\text{H}_5\text{Cl}_2\text{F}_3^{74}\text{Se}[\text{M}]^+$ : 301.8945, Found: 301.8957.

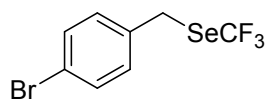

**2e**

(4-bromobenzyl) (trifluoromethyl) selane; 71%; white liquid;  $^1\text{H}$  NMR (400 MHz,  $\text{CDCl}_3$ )  $\delta$  7.44 (d,  $J = 8.1$  Hz, 2H), 7.20 (d,  $J = 8.1$  Hz, 2H), 4.16 (s, 2H).  $^{19}\text{F}$  NMR (376 MHz,  $\text{CDCl}_3$ )  $\delta$  -34.36 (s, 3F).  $^{13}\text{C}$  NMR (101 MHz,  $\text{CDCl}_3$ )  $\delta$  135.3 (s), 132.0 (s), 130.7 (s), 122.5 (q,  $J = 331.0$  Hz), 121.8 (s), 28.4 (q,  $J = 1.7$  Hz). IR (neat)  $\nu = 2960, 2925, 2853, 1590, 1488, 1420, 1403, 1261, 1097, 1012, 801, 477\text{cm}^{-1}$ ; HRMS (EI) Calcd for  $\text{C}_8\text{H}_6^{79}\text{BrF}_3^{74}\text{Se}[\text{M}]^+$ : 311.8830, Found: 311.8844.

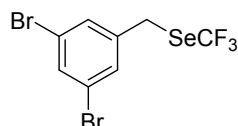

**2f**

(3,5-dibromobenzyl) (trifluoromethyl) selane; 81%; slightly yellow liquid;  $^1\text{H}$  NMR (400 MHz,  $\text{CDCl}_3$ )  $\delta$  7.58 (s, 1H), 7.42 (s, 2H), 4.12 (s, 2H).  $^{19}\text{F}$  NMR (376 MHz,  $\text{CDCl}_3$ )  $\delta$  -34.29 (s, 3F).  $^{13}\text{C}$  NMR (101 MHz,  $\text{CDCl}_3$ )  $\delta$  140.3 (s), 133.5 (s), 130.8 (s), 123.2 (s), 122.4 (q,  $J = 331.0$  Hz), 27.5 (s). IR (neat)  $\nu = 1584, 1556, 1425, 1219, 1097, 1074, 858, 742, 684\text{cm}^{-1}$ ; HRMS (EI) Calcd for  $\text{C}_8\text{H}_5^{79}\text{Br}_2\text{F}_3^{74}\text{Se}[\text{M}]^+$ : 389.7935, Found: 389.7932.

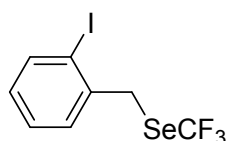

**2g**

(2-iodobenzyl) (trifluoromethyl) selane; 43%; slightly yellow liquid;  $^1\text{H}$  NMR (400 MHz,  $\text{CDCl}_3$ )  $\delta$  7.84 (d,  $J = 7.8$  Hz, 1H), 7.38 (d,  $J = 7.5$  Hz, 1H), 7.30 (t,  $J = 7.4$  Hz, 1H), 6.95 (t,  $J = 7.6$  Hz, 1H), 4.29 (s, 2H).  $^{19}\text{F}$  NMR (376 MHz,  $\text{CDCl}_3$ )  $\delta$  -34.29 (s, 3F).  $^{13}\text{C}$  NMR (101 MHz,  $\text{CDCl}_3$ )  $\delta$  139.84 (s), 139.75 (s), 130.0 (s), 129.4 (s), 128.8 (s), 122.8 (q,  $J = 331.9$  Hz), 100.6 (s), 34.8 (q,  $J = 1.6$  Hz). IR (neat)  $\nu = 2924, 1563, 1468, 1437, 1199, 1096, 1013, 754, 737, 718, 646\text{cm}^{-1}$ ; HRMS (EI) Calcd for  $\text{C}_8\text{H}_6\text{F}_3\text{I}^{74}\text{Se}[\text{M}]^+$ : 359.8691, Found: 359.8695.

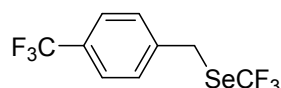

**2h**

(trifluoromethyl) (4-(trifluoromethyl) benzyl) selane; 50%; slightly yellow liquid;  $^1\text{H}$  NMR (400 MHz,  $\text{CDCl}_3$ )  $\delta$  7.58 (d,  $J = 8.2$  Hz, 2H), 7.44 (d,  $J = 8.1$  Hz, 2H), 4.24 (s, 2H).  $^{19}\text{F}$  NMR (376 MHz,  $\text{CDCl}_3$ )  $\delta$  -34.39 (s, 3F), -62.73 (s, 3F).  $^{13}\text{C}$  NMR (101 MHz,  $\text{CDCl}_3$ )  $\delta$  140.6 (s), 130.0 (q,  $J = 33.0$  Hz), 129.3 (s), 125.8 (q,  $J = 3.8$  Hz), 124.0 (q,  $J = 272.1$  Hz), 123.1 (q,  $J = 333.0$  Hz), 28.3 (q,  $J = 1.6$  Hz). IR (neat)  $\nu = 1618, 1558, 1326, 1123, 1097, 1067, 1019, 848, 753, 739\text{cm}^{-1}$ ; HRMS (EI) Calcd for  $\text{C}_9\text{H}_6\text{F}_6^{74}\text{Se}[\text{M}]^+$ : 301.9598, Found: 301.9592.

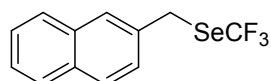

**2i**

(naphthalen-2-ylmethyl) (trifluoromethyl) selane; 41%; white solid; M. P.: 48 °C;

$^1\text{H}$  NMR (400 MHz,  $\text{CDCl}_3$ )  $\delta$  7.83-7.78 (m, 4H), 7.52-7.43 (m, 3H), 4.41 (s, 2H).  $^{19}\text{F}$  NMR (376 MHz,  $\text{CDCl}_3$ )  $\delta$  -34.35 (s, 3F).  $^{13}\text{C}$  NMR (101 MHz,  $\text{CDCl}_3$ )  $\delta$  133.43 (s), 133.36 (s), 132.8 (s), 128.8 (s), 127.9 (s), 127.76 (s), 127.75 (s), 126.8(s), 126.5 (s), 126.3 (s), 122.9 (q,  $J = 331.4$  Hz), 29.6 (q,  $J = 1.7$  Hz). IR (neat)  $\nu = 1598, 1507, 1201, 1096, 966, 953, 867, 826, 751, 737, 480\text{cm}^{-1}$ ; HRMS (EI) Calcd for  $\text{C}_{12}\text{H}_9\text{F}_3^{74}\text{Se}[\text{M}]^+$ : 283.9881, Found: 283.9884.

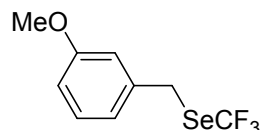

**2j**

(3-methoxybenzyl) (trifluoromethyl) selane<sup>1</sup>; 71%; white liquid;  $^1\text{H}$  NMR (400 MHz,  $\text{CDCl}_3$ )  $\delta$  7.23 (t,  $J = 7.9$  Hz, 1H), 6.91 (d,  $J = 8.0$  Hz, 1H), 6.85 (t,  $J = 1.9$  Hz, 1H), 6.81 (dd,  $J = 8.2$  Hz, 2.0 Hz, 1H), 4.21 (s, 2H), 3.80 (s, 3H).  $^{19}\text{F}$  NMR (376 MHz,  $\text{CDCl}_3$ )  $\delta$  -34.53 (s, 3F).

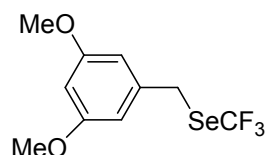

**2k**

(3,5-dimethoxybenzyl) (trifluoromethyl) selane; 50%; slightly yellow liquid;  $^1\text{H}$  NMR (400 MHz,  $\text{CDCl}_3$ )  $\delta$  6.47 (d,  $J = 2.2$  Hz, 2H), 6.35 (t,  $J = 2.2$  Hz, 1H), 4.16 (s, 2H), 3.77 (s, 6H).  $^{19}\text{F}$  NMR (376 MHz,  $\text{CDCl}_3$ )  $\delta$  -34.57 (s, 3F).  $^{13}\text{C}$  NMR (101 MHz,  $\text{CDCl}_3$ )  $\delta$  161.1 (s), 138.2 (s), 122.9 (q,  $J = 331.4$  Hz), 107.0 (s), 99.8 (s), 55.3 (s), 29.3 (q,  $J = 1.7$  Hz). IR (neat)  $\nu = 1608, 1598, 1464, 1430, 1325, 1207, 1158, 1099, 1066, 930, 737\text{cm}^{-1}$ ; HRMS (EI) Calcd for  $\text{C}_{10}\text{H}_{11}\text{F}_3\text{O}_2^{74}\text{Se}[\text{M}]^+$ : 293.9936, Found: 293.9944.

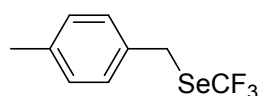

**2l**

(4-methylbenzyl) (trifluoromethyl) selane<sup>2</sup>; 58%; slightly yellow liquid;  $^1\text{H}$  NMR (400 MHz,  $\text{CDCl}_3$ )  $\delta$  7.22 (d,  $J = 8.0$  Hz, 2H), 7.13 (d,  $J = 7.9$  Hz, 2H), 4.22 (s, 2H), 2.33 (s, 3H).  $^{19}\text{F}$  NMR (376 MHz,  $\text{CDCl}_3$ )  $\delta$  -34.50 (s, 3F).

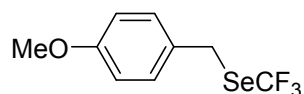

**2m**

(4-methoxybenzyl)(trifluoromethyl)selane; 45%; slightly yellow liquid;  $^1\text{H}$  NMR (400 MHz,  $\text{CDCl}_3$ )  $\delta$  7.25 (d,  $J = 8.5$  Hz, 2H), 6.84 (d,  $J = 8.5$  Hz, 2H), 4.21 (s, 2H), 3.79

(s, 3H).  $^{19}\text{F}$  NMR (376 MHz,  $\text{CDCl}_3$ )  $\delta$  -34.45 (s, 3F).  $^{13}\text{C}$  NMR (101 MHz,  $\text{CDCl}_3$ )  $\delta$  159.2 (s), 130.2 (s), 127.8 (s), 122.9 (q,  $J = 333.2$  Hz), 114.3 (s), 55.3 (s), 28.8 (q,  $J = 1.8$  Hz). IR (neat)  $\nu = 2956, 1608, 1512, 1464, 1322, 1251, 1096, 1071, 1034, 737, 598\text{cm}^{-1}$ ; HRMS (EI) Calcd for  $\text{C}_9\text{H}_9\text{F}_3\text{O}^{74}\text{Se}[\text{M}]^+$ : 263.9830, Found: 263.9819.

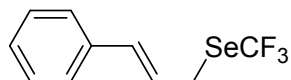

**2n**

cinnamyl(trifluoromethyl)selane<sup>3</sup>; The yield determined by  $^{19}\text{F}$  NMR spectroscopy was 12%;  $^{19}\text{F}$  NMR (376 MHz,  $\text{CDCl}_3$ )  $\delta$  -33.86 (s, 3F).

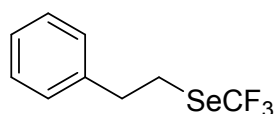

**2o**

phenethyl(trifluoromethyl)selane<sup>1, 2</sup>; The yield determined by  $^{19}\text{F}$  NMR spectroscopy was 20%;  $^{19}\text{F}$  NMR (376 MHz,  $\text{CDCl}_3$ )  $\delta$  -34.03 (s, 3F).

### 3. The observation of $[\text{CuSeCF}_3]$ intermediate

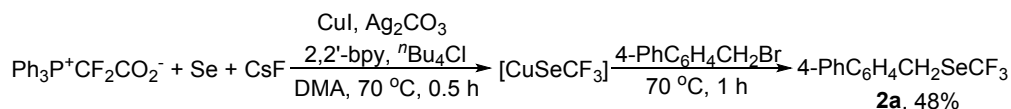

Into a 10 mL sealed tube were added  $\text{Ph}_3\text{P}^+\text{CF}_2\text{CO}_2^-$  (0.4 mmol, 142.4 mg), Se (1.2 mmol, 94.8 mg), CsF (0.6 mmol, 91.2 mg), CuI (0.6 mmol, 114.3 mg), 2,2'-bpy (0.4 mmol, 62.4 mg),  $^n\text{Bu}_4\text{NCl}$  (0.4 mmol, 111 mg),  $\text{Ag}_2\text{CO}_3$  (0.04 mmol, 11.1 mg) and DMA (3 mL) under a  $\text{N}_2$  atmosphere. The tube was sealed and the mixture was stirred at 70  $^\circ\text{C}$  for 0.5 h.  $^{19}\text{F}$  NMR analysis showed that  $[\text{CuSeCF}_3]$  complex was generated (0.2 mmol of  $\text{PhCF}_3$  was used as an internal standard). The  $^{19}\text{F}$  NMR spectrum is shown as follows. The  $^{19}\text{F}$  NMR yield was quite low (10% based on  $\text{Ph}_3\text{P}^+\text{CF}_2\text{CO}_2^-$ ), because the complex decomposed during the process of collecting  $^{19}\text{F}$  NMR spectrum due to its instability.  $\text{CuSeCF}_3$ ,  $^{19}\text{F}$  NMR (376 MHz,  $\text{CDCl}_3$ )  $\delta$  -26.37 (s, 3F)<sup>1</sup>.

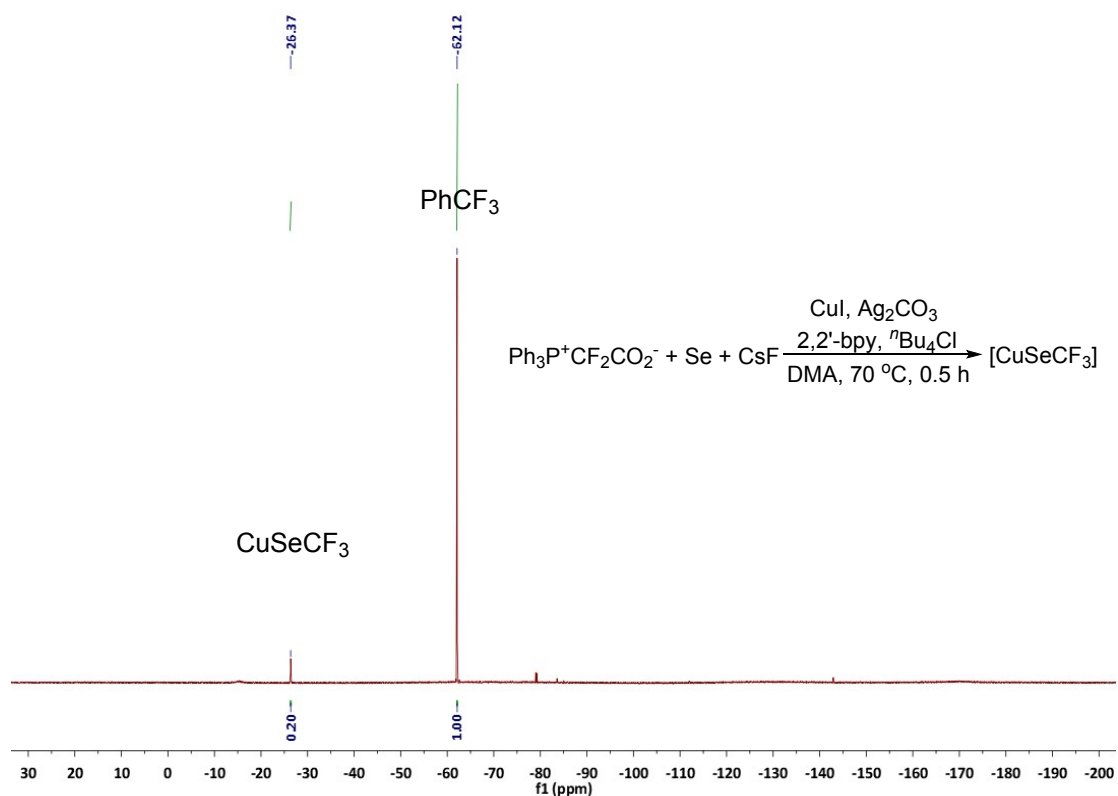

In order to prove that  $\text{CuSeCF}_3$  is the key intermediate, substrate **1a** was added after the complex was generated. The procedure is shown as follows.

Into a 10 mL sealed tube were added  $\text{Ph}_3\text{P}^+\text{CF}_2\text{CO}_2^-$  (0.4 mmol, 142.4 mg), Se (1.2 mmol, 94.8 mg), CsF (0.6 mmol, 91.2 mg), CuI (0.6 mmol, 114.3 mg), 2,2'-bpy (0.4 mmol, 62.4 mg),  $^n\text{Bu}_4\text{NCl}$  (0.4 mmol, 111 mg),  $\text{Ag}_2\text{CO}_3$  (0.04 mmol, 11.1 mg) and DMA (3 mL) under a  $\text{N}_2$  atmosphere. The tube was sealed and the mixture was stirred at 70 °C for 0.5 h. Substrate **1a** (0.2 mmol, 49.4 mg) was added and the resulting mixture was stirred at 70 °C for 1 h. The  $^{19}\text{F}$  NMR analysis revealed that the desired product was obtained in 48% yield (0.2 mmol of  $\text{PhCF}_3$  was used as an internal standard). The  $^{19}\text{F}$  NMR spectrum is shown as follows.

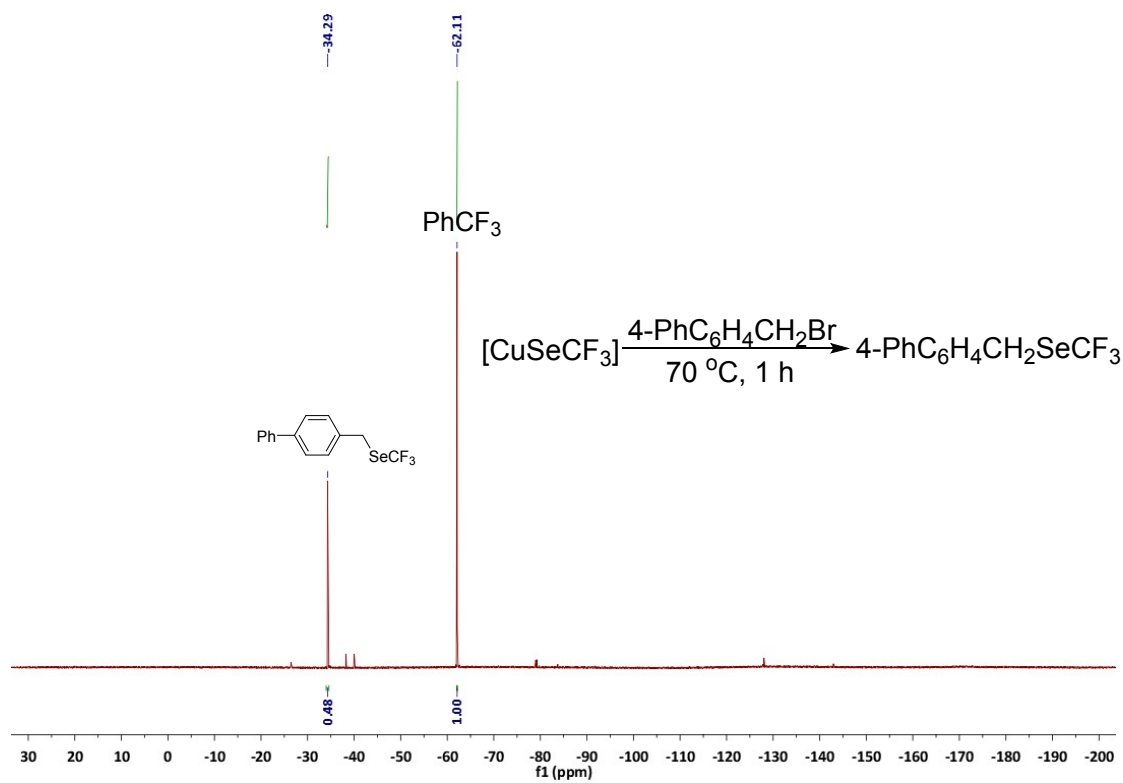



#### 4. References

- (1) C. Chen, L. Ouyang, Q. Lin, Y. Liu, C. Hou, Y. Yuan and Z. Weng, *Chem. Eur. J.*, 2014, **20**, 657-661.
- (2) C. Chen, C. Hou, Y. Wang, T. S. A. Hor and Z. Weng, *Org. Lett.*, 2014, **16**, 524-527.
- (3) M. Rong, R. Huang, Y. You and Z. Weng, *Tetrahedron*, 2014, **70**, 8872-8878.

## 5. Copies of $^{19}\text{F}$ NMR, $^1\text{H}$ NMR, and $^{13}\text{C}$ NMR spectra

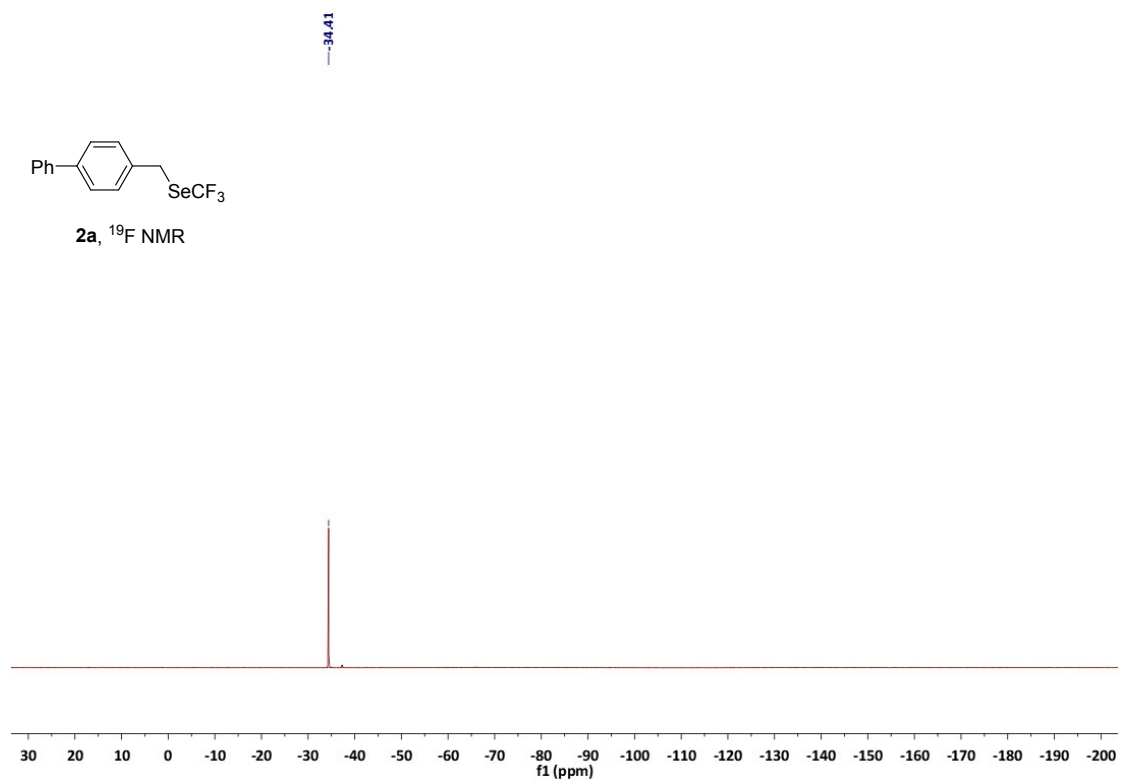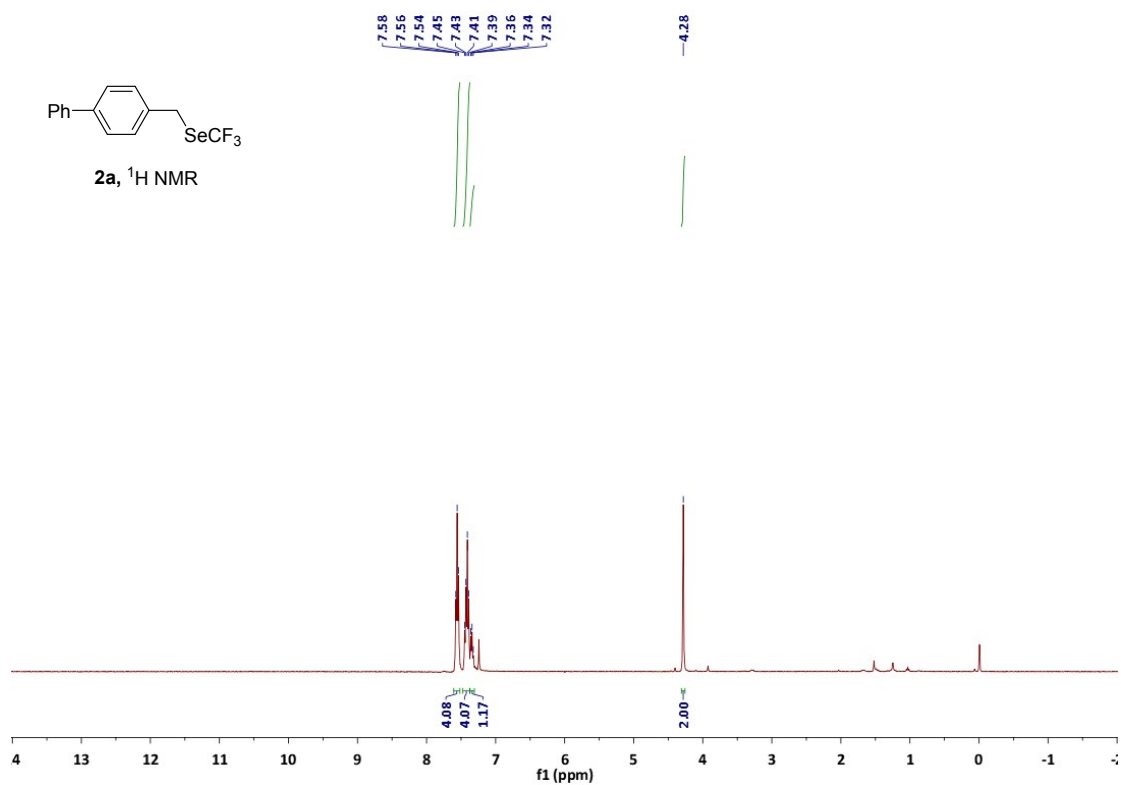

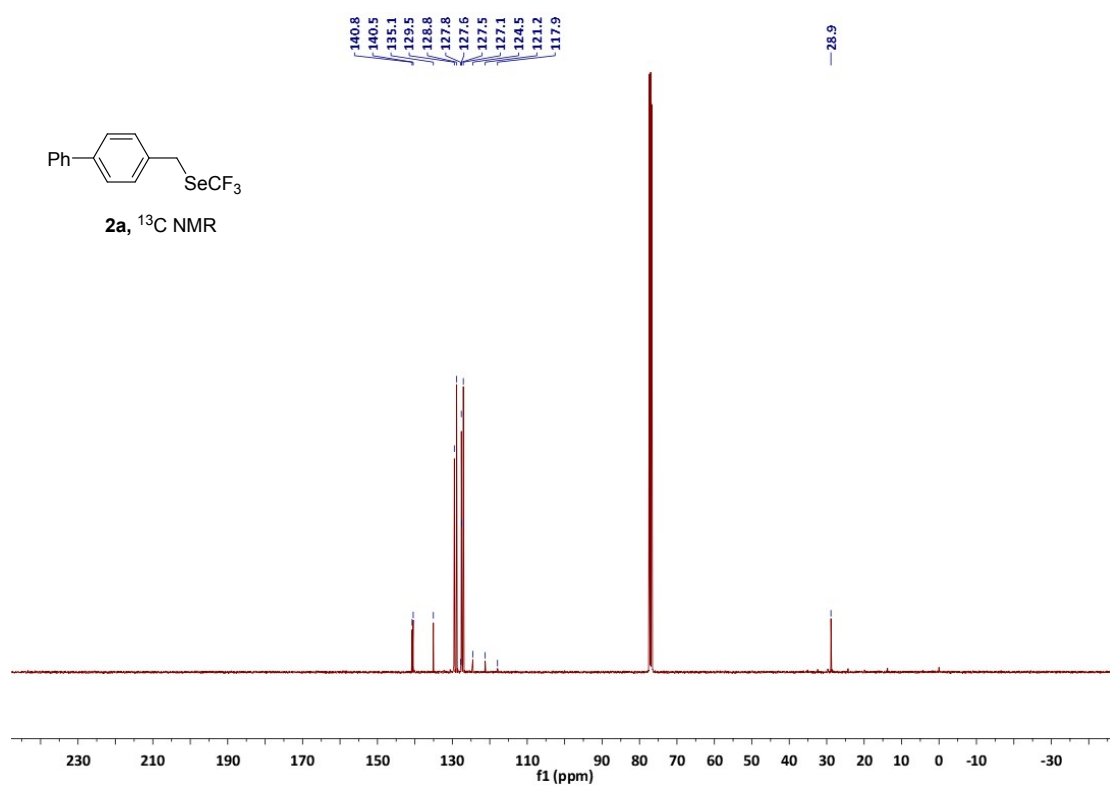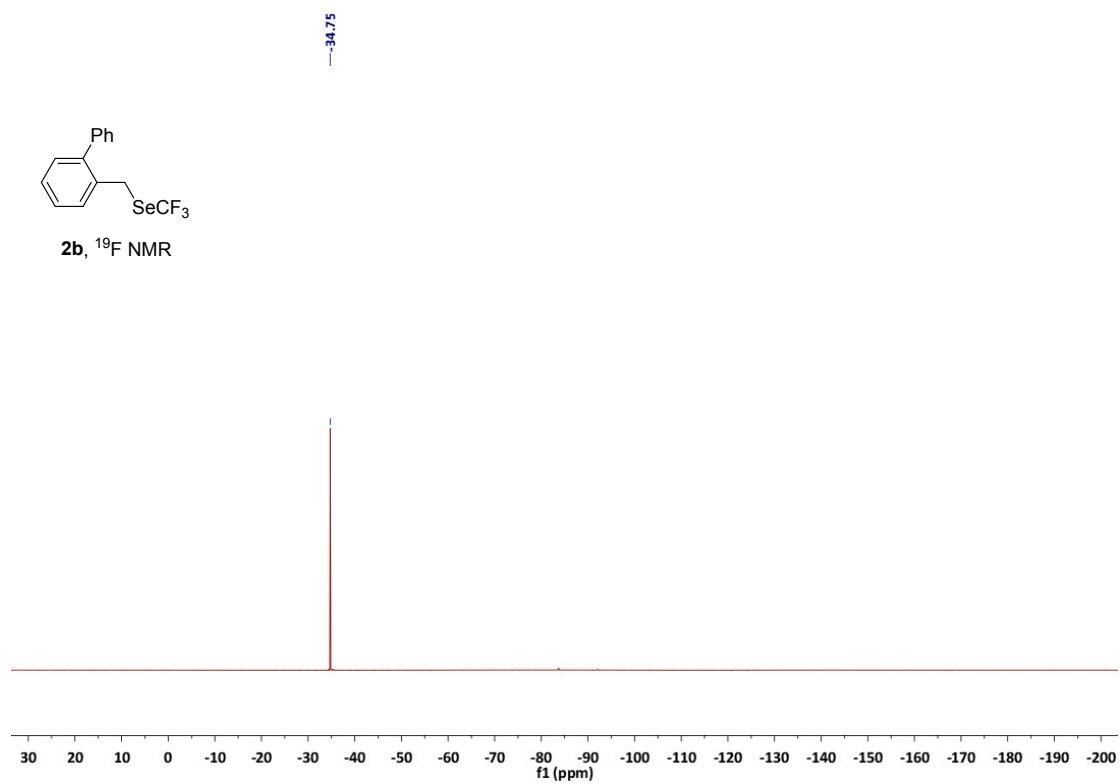

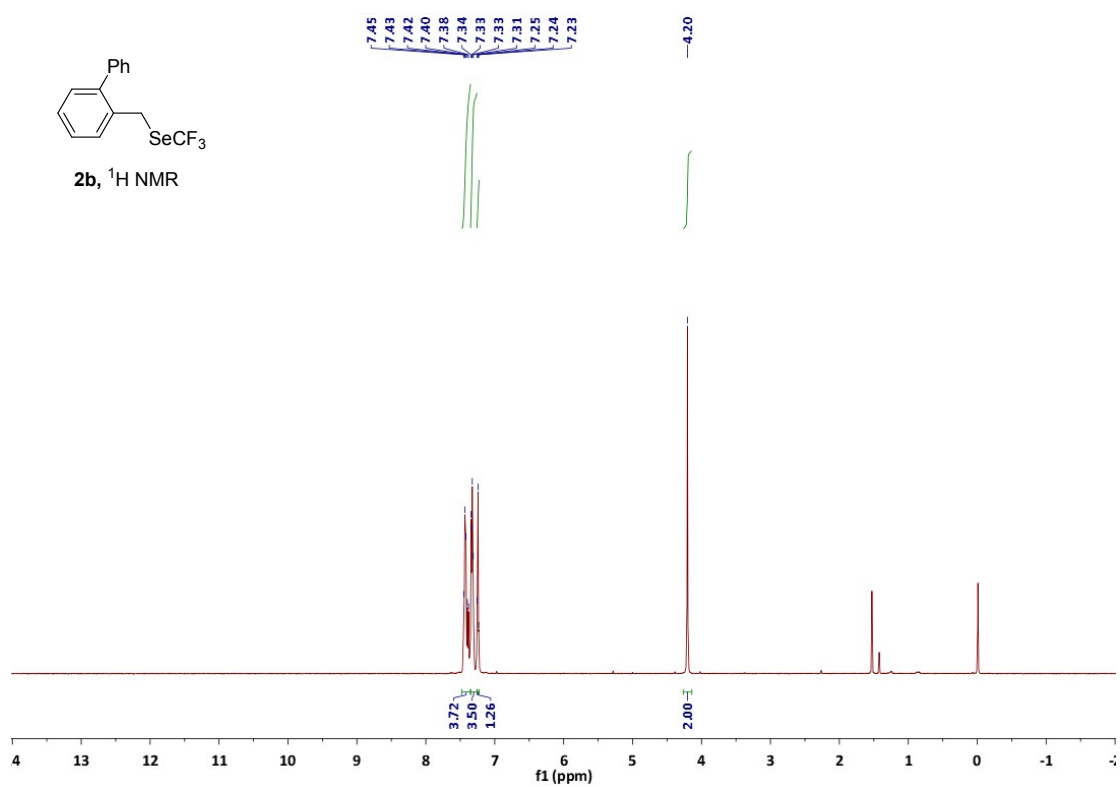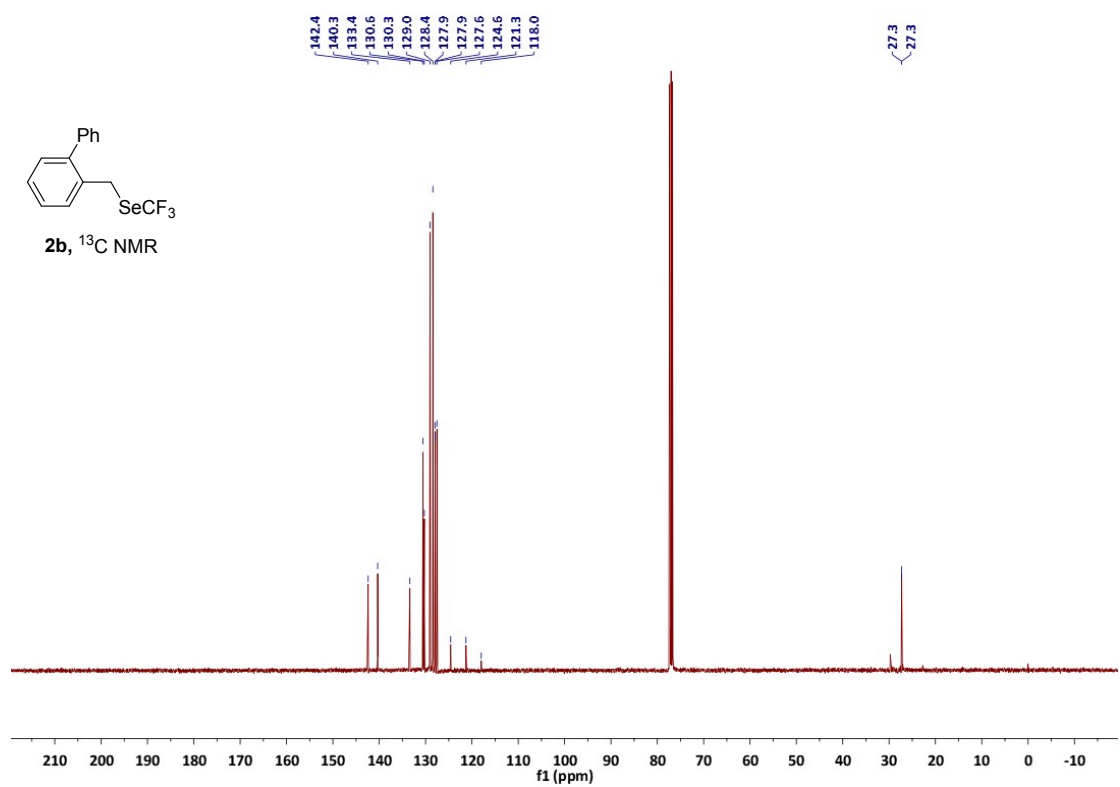

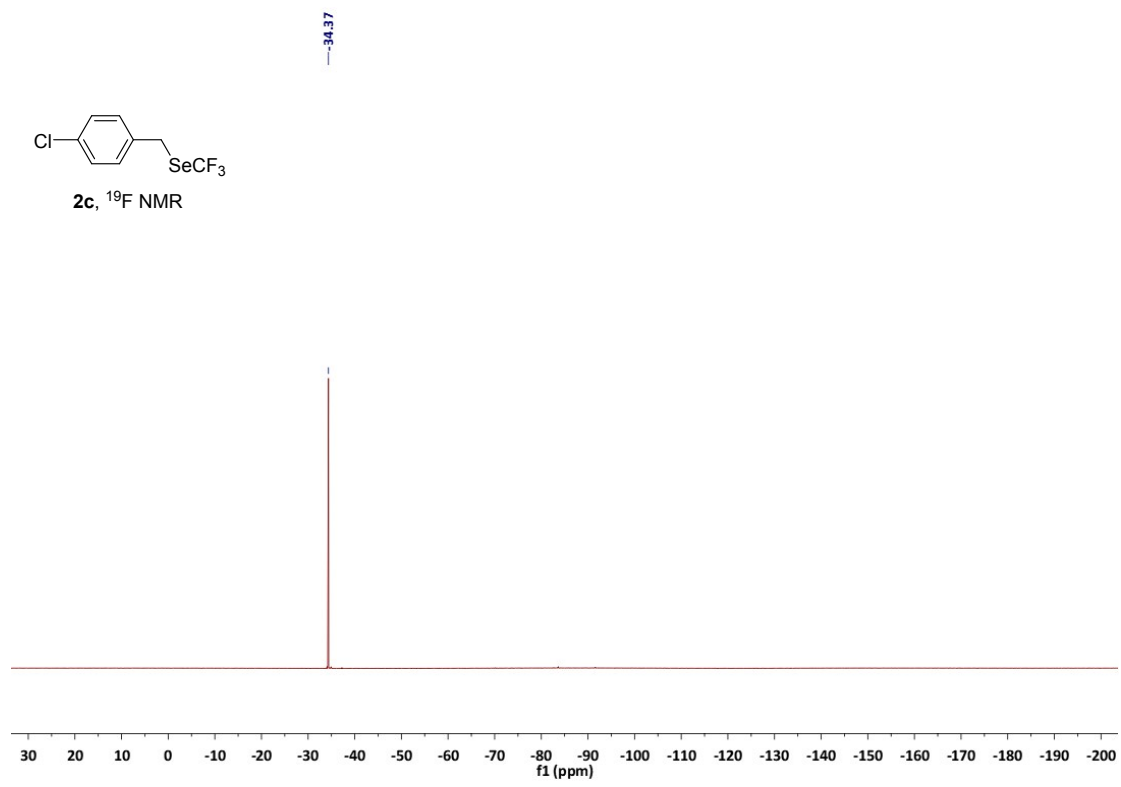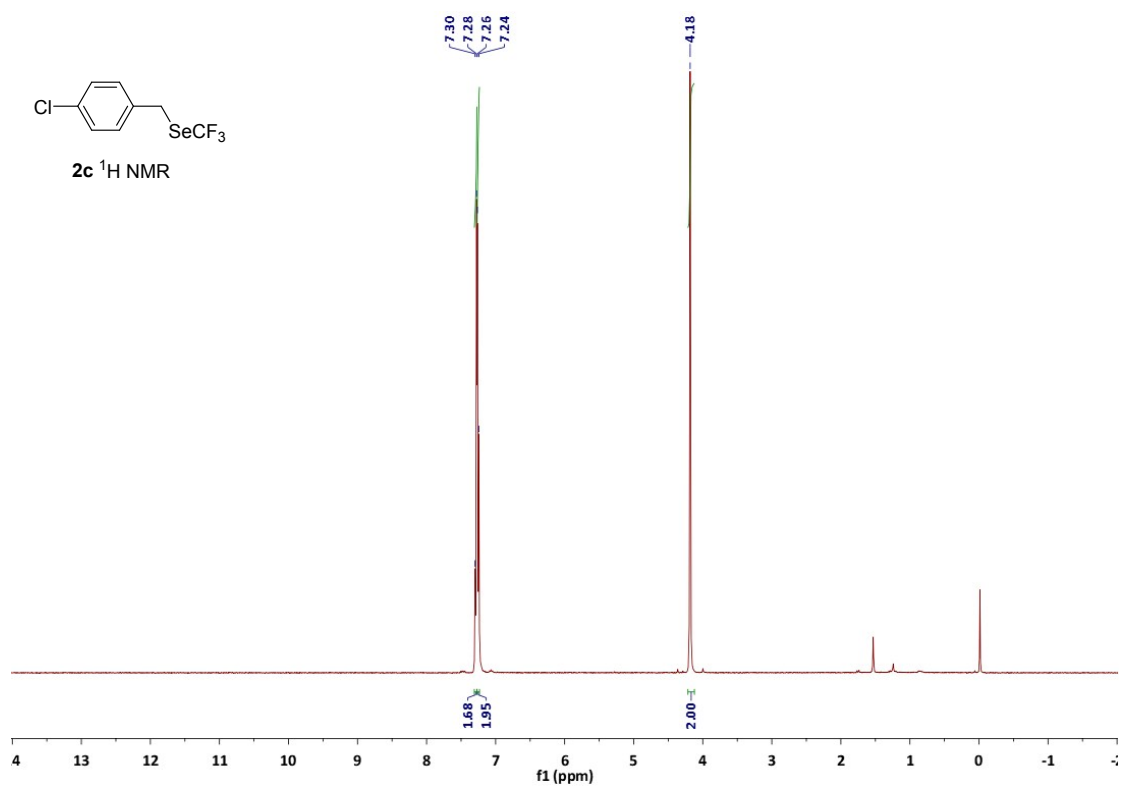

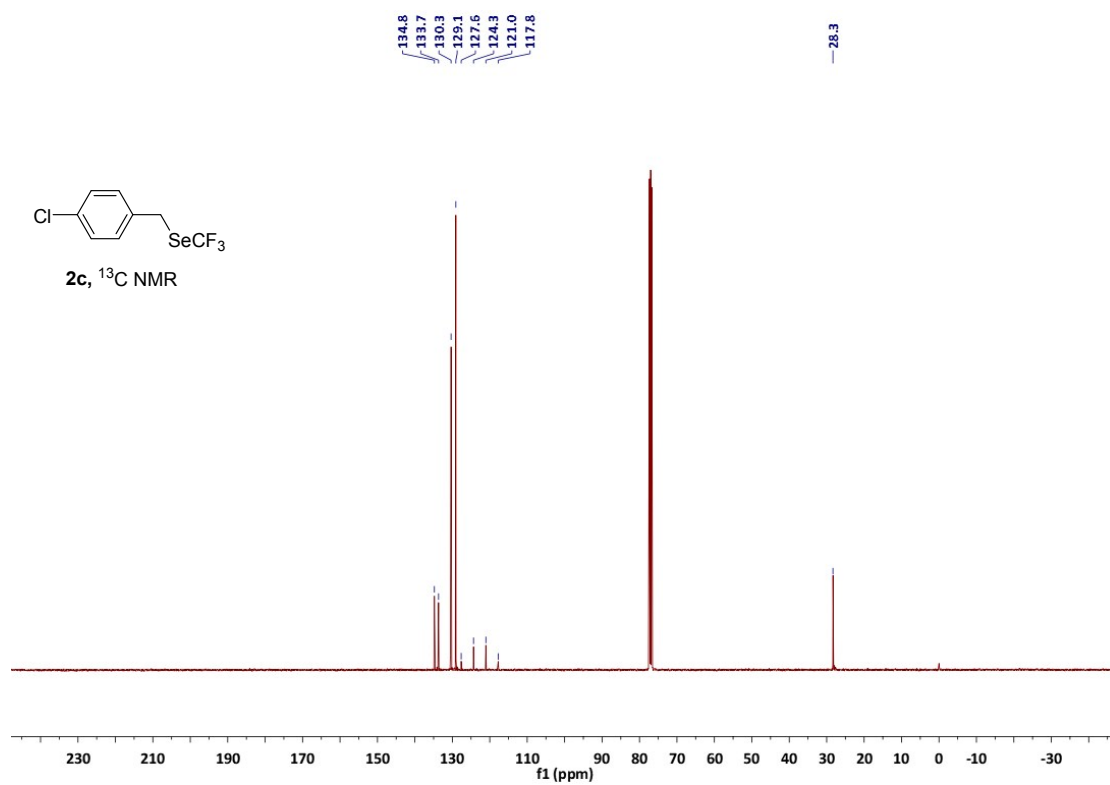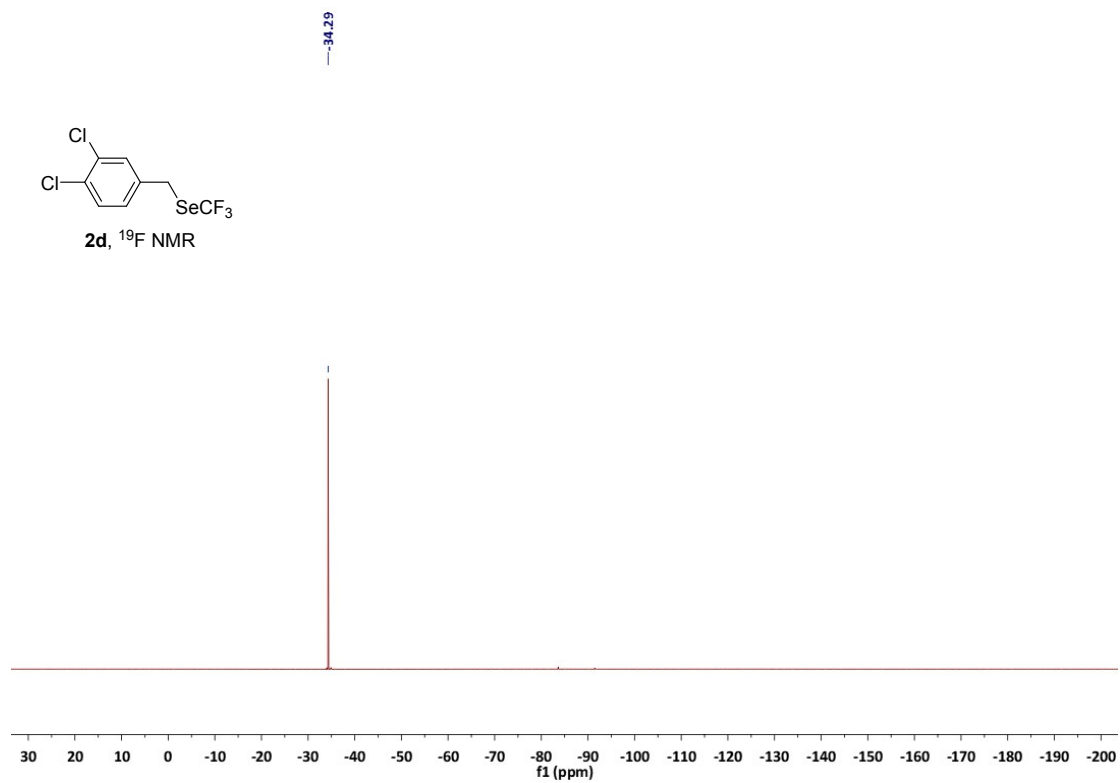

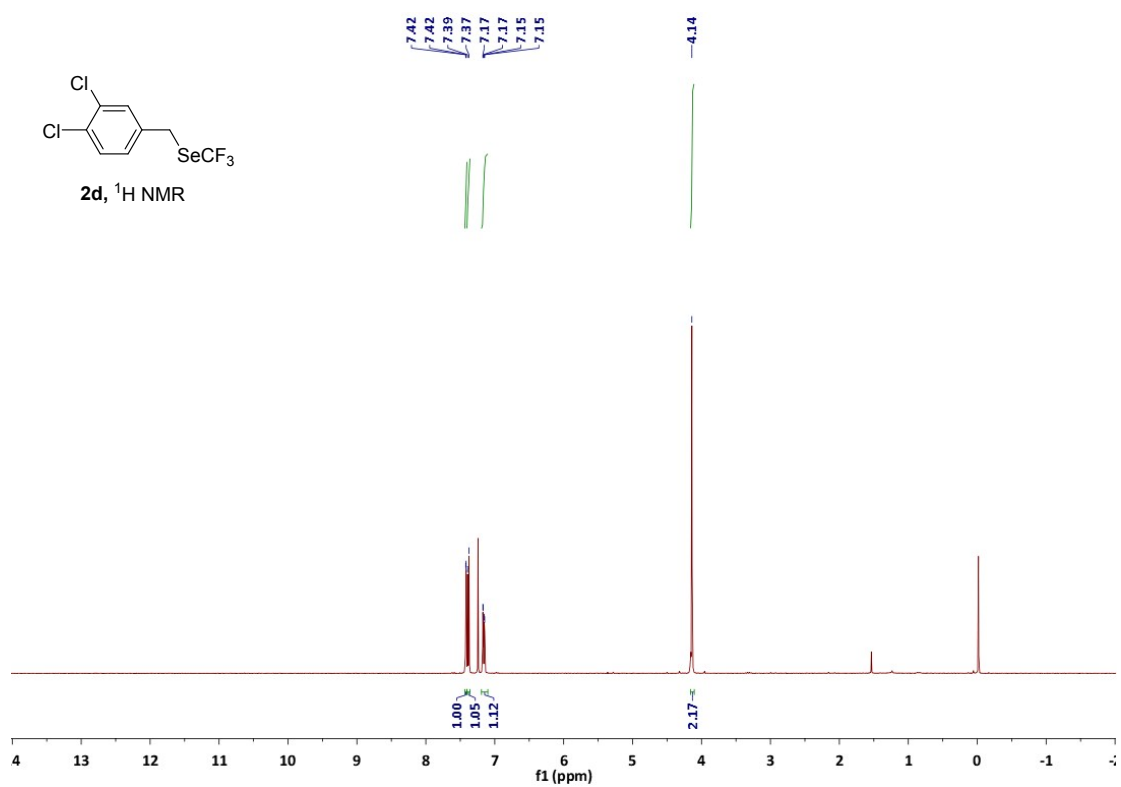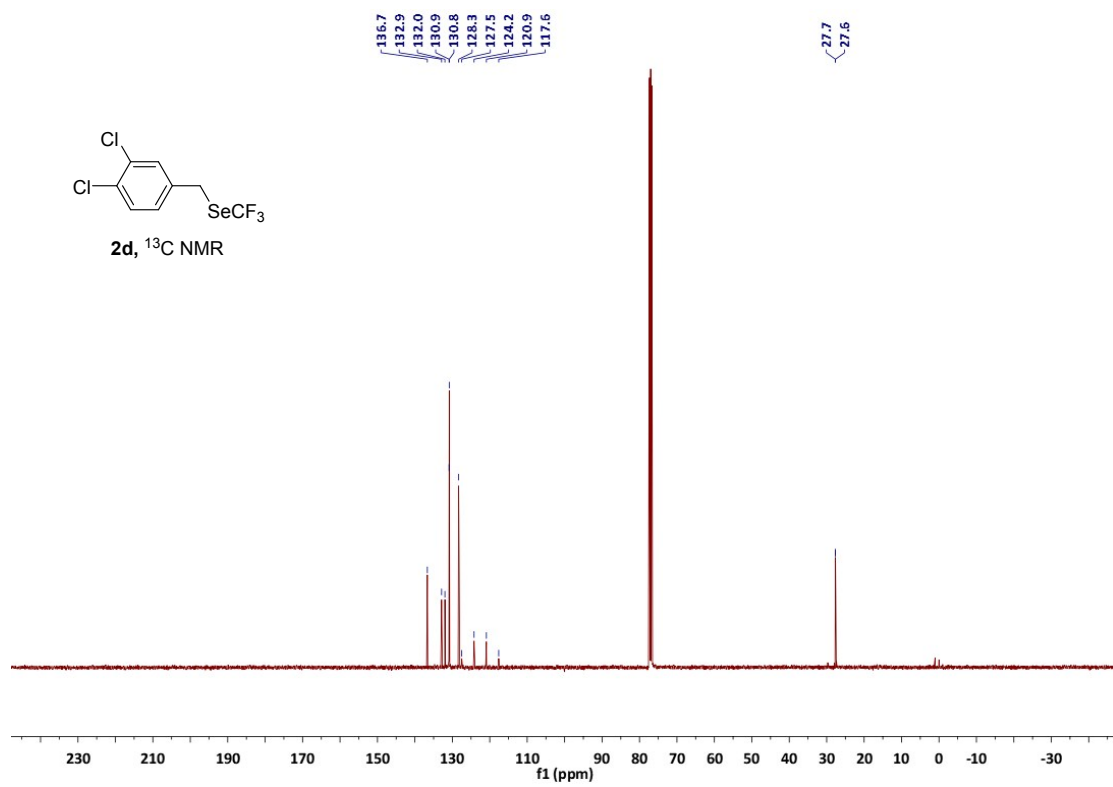

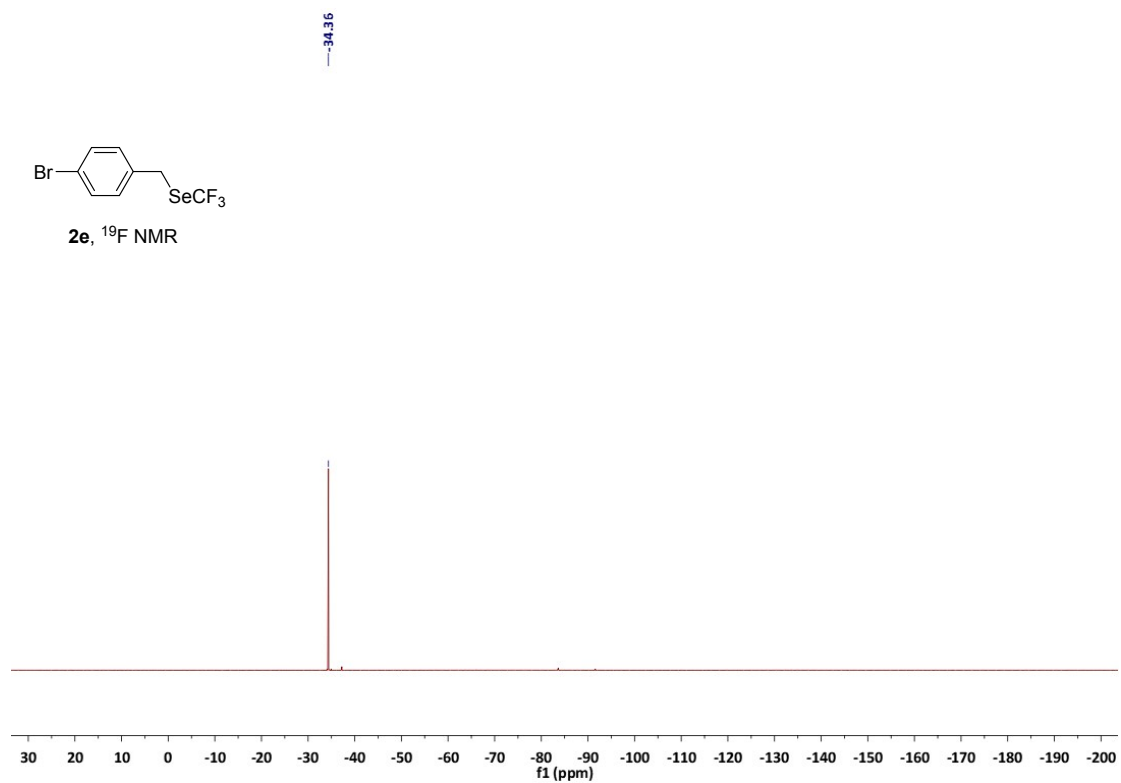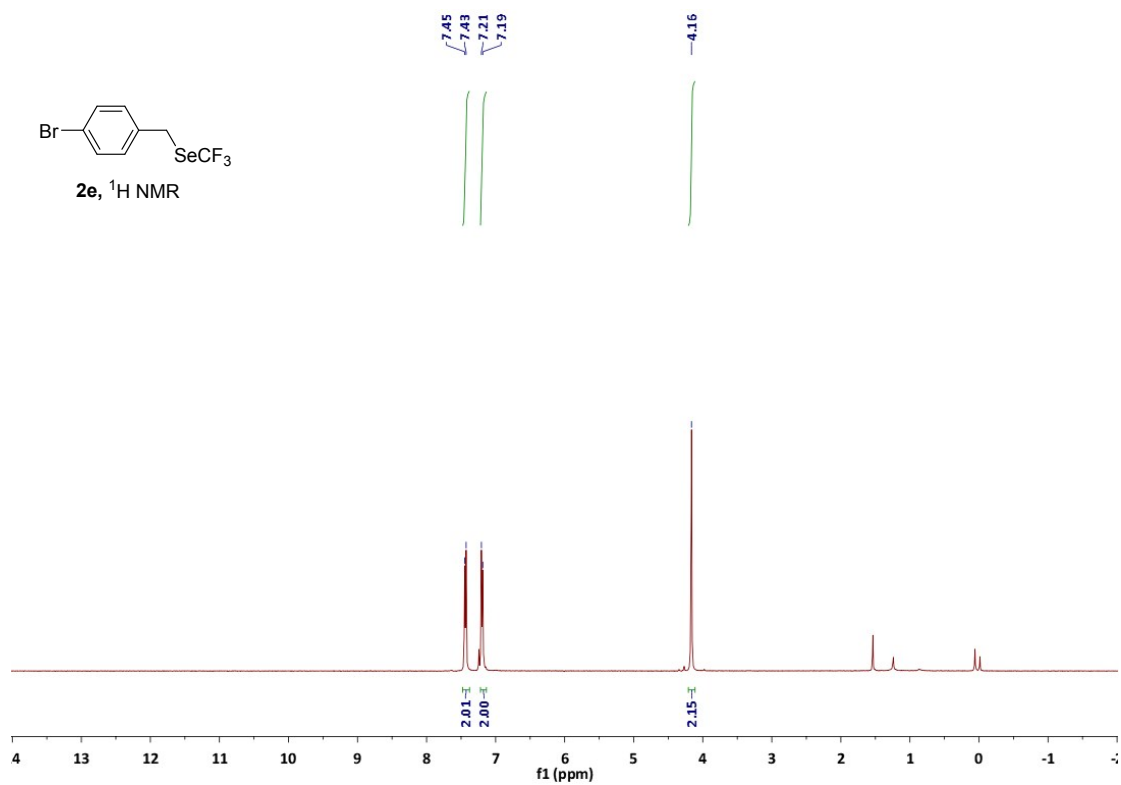



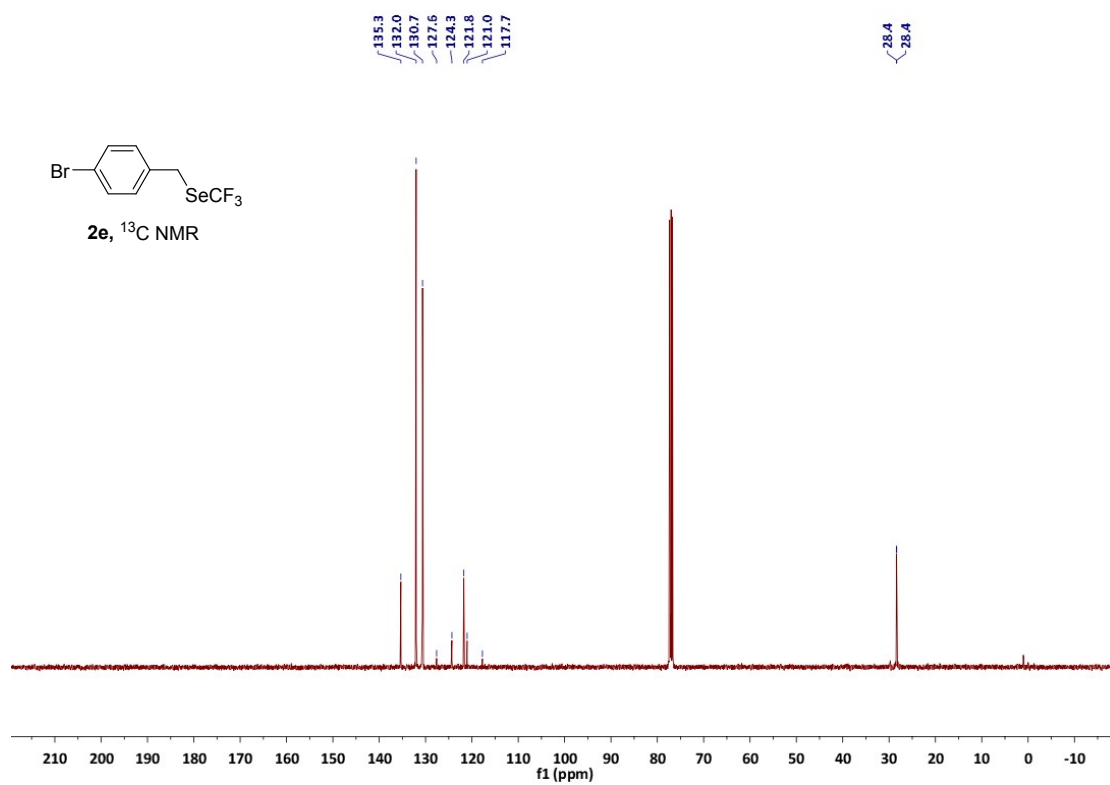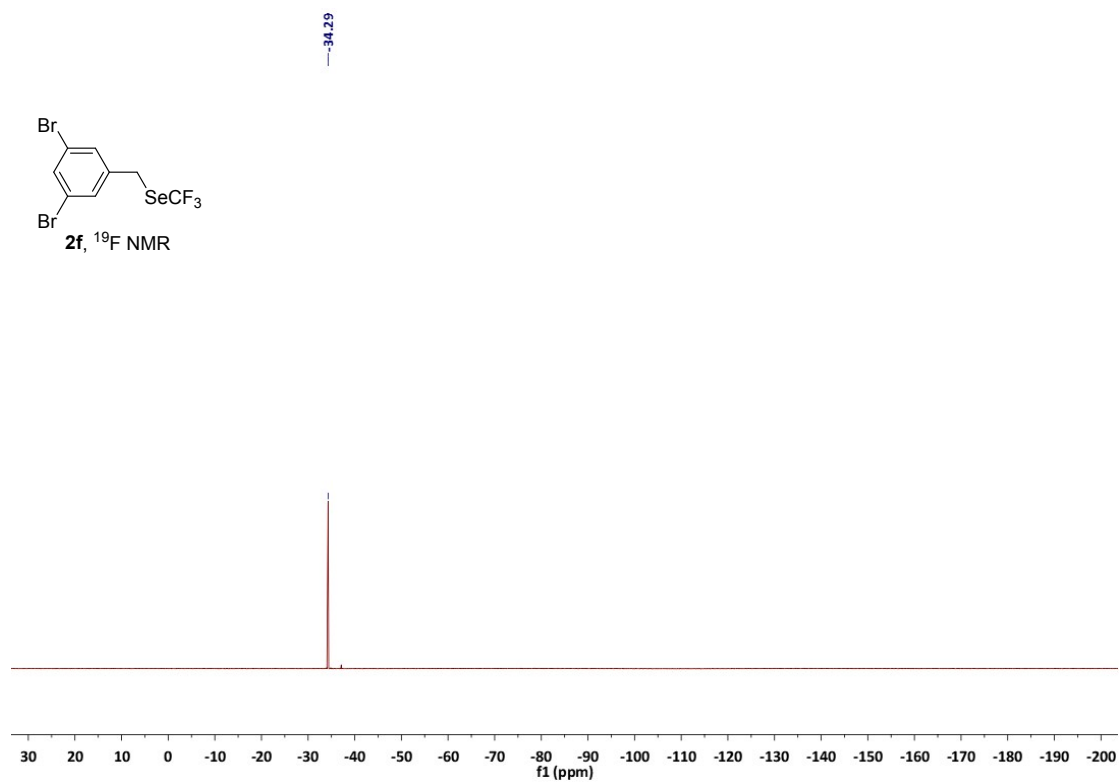

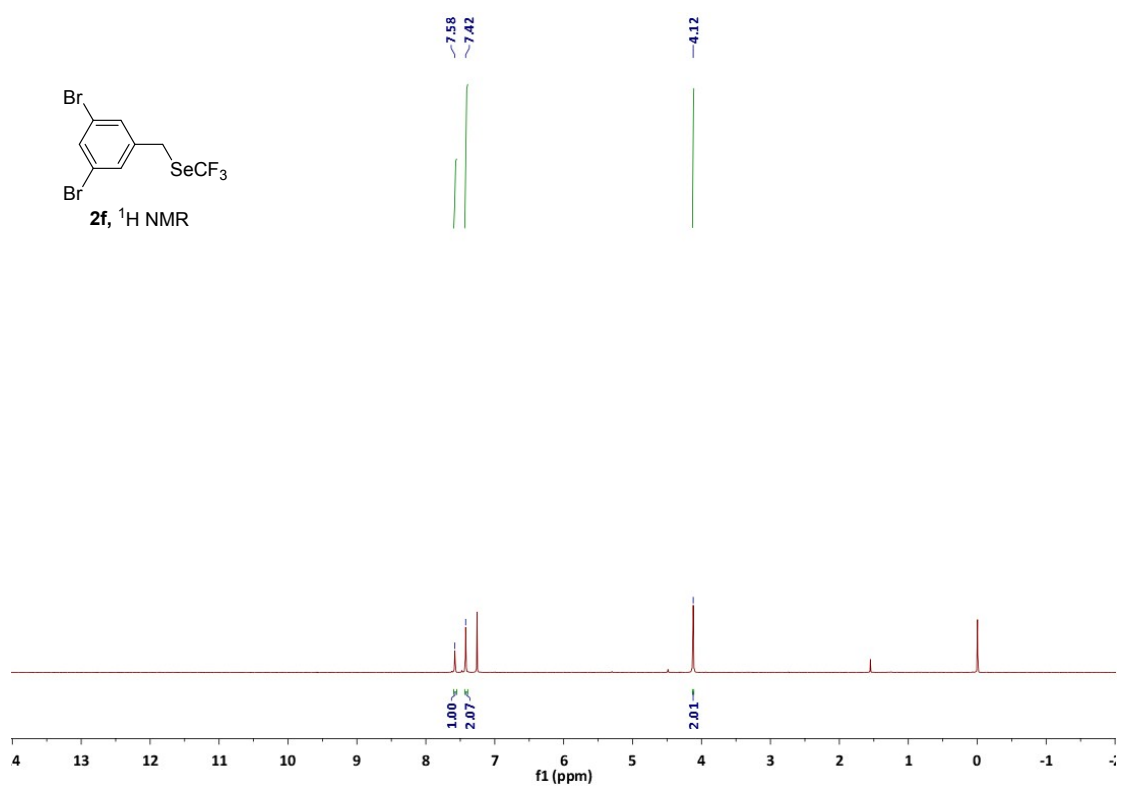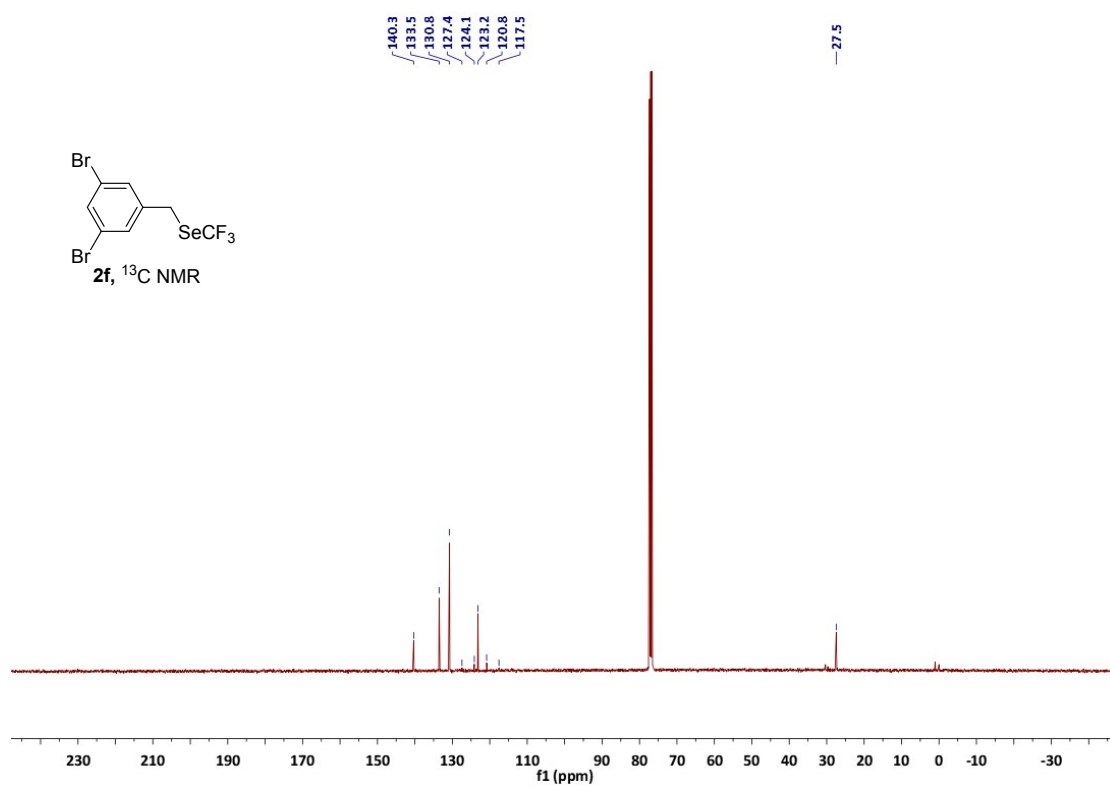

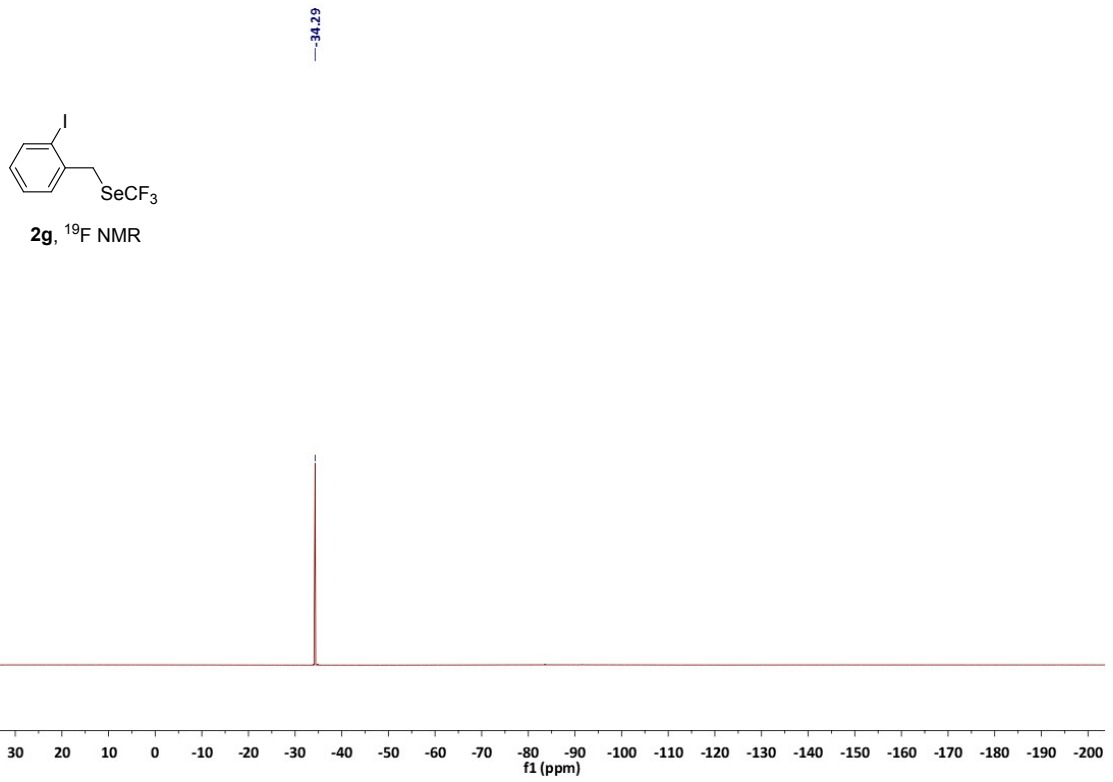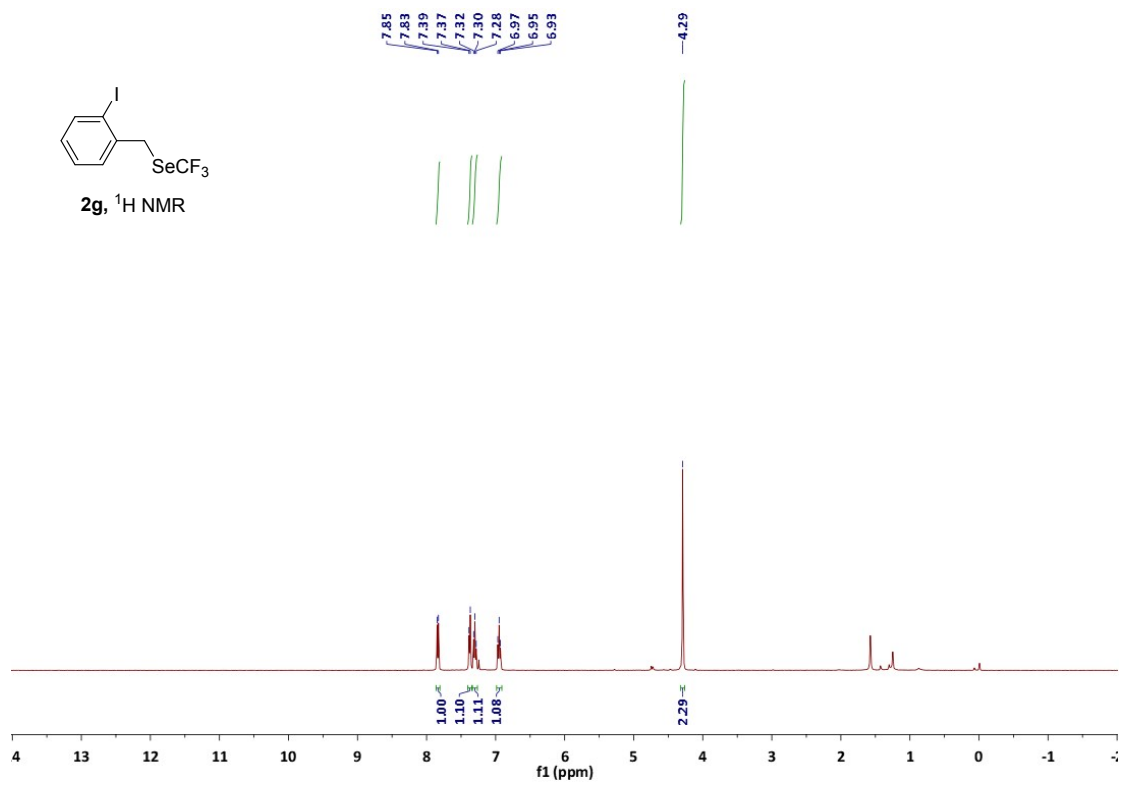

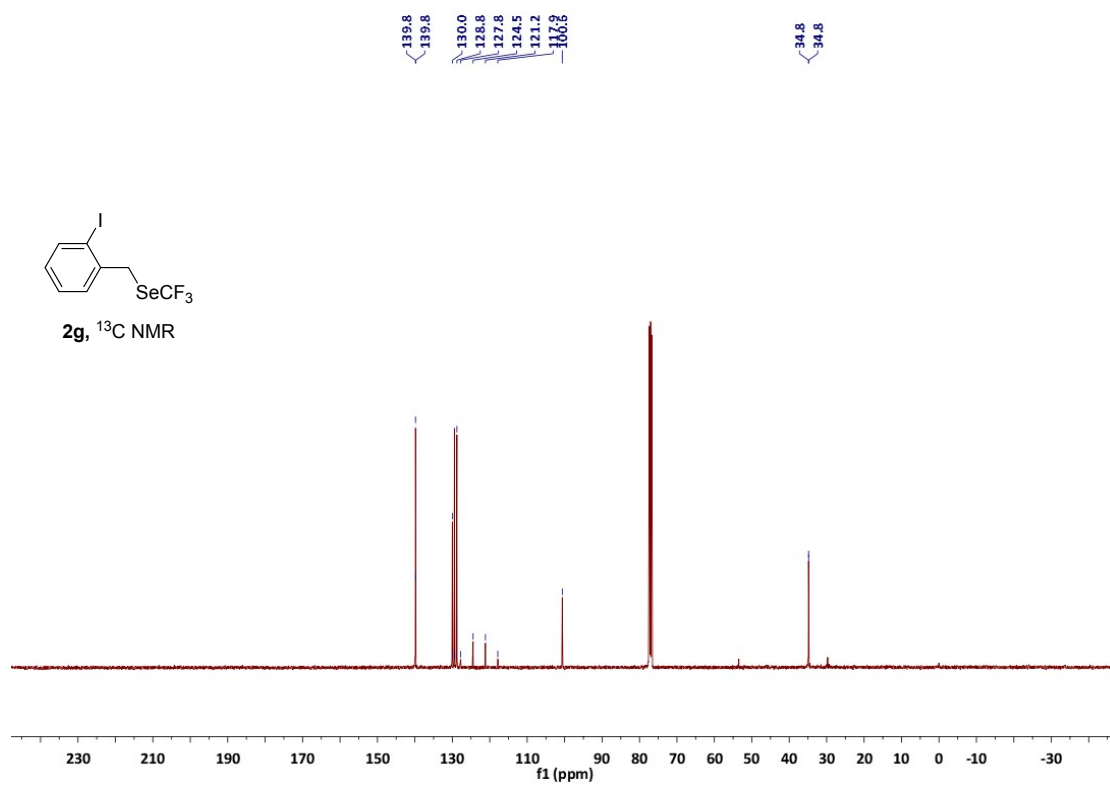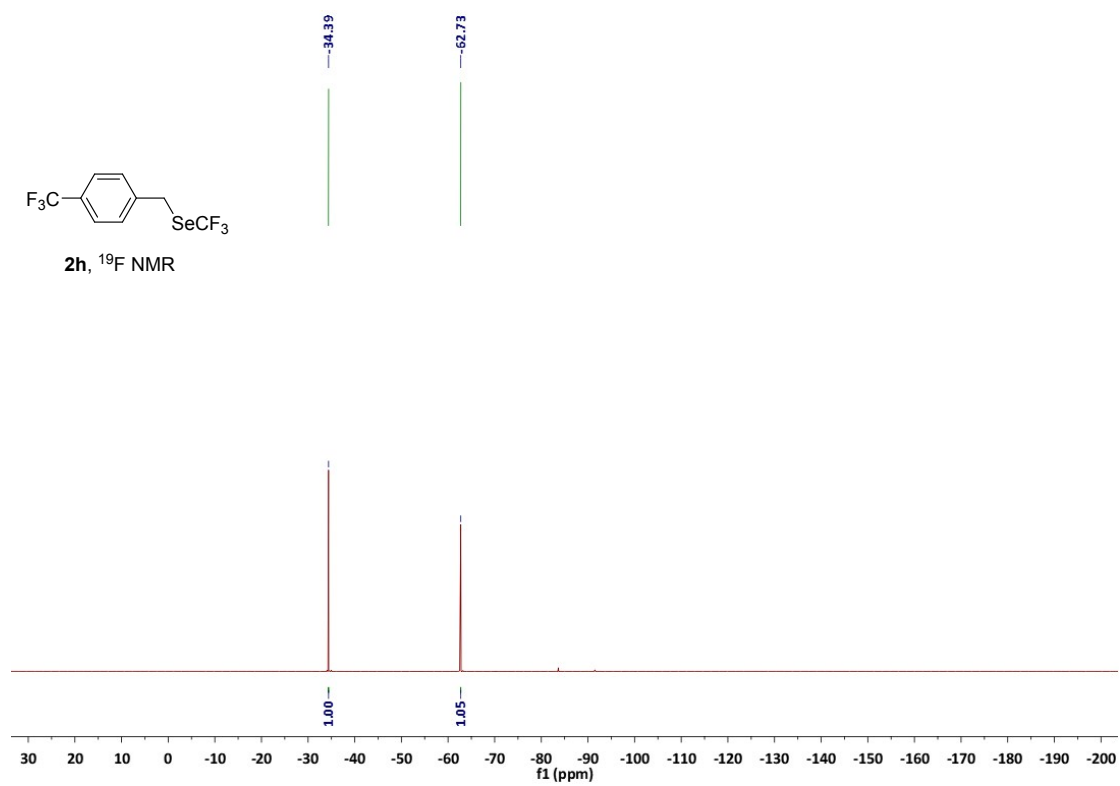

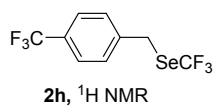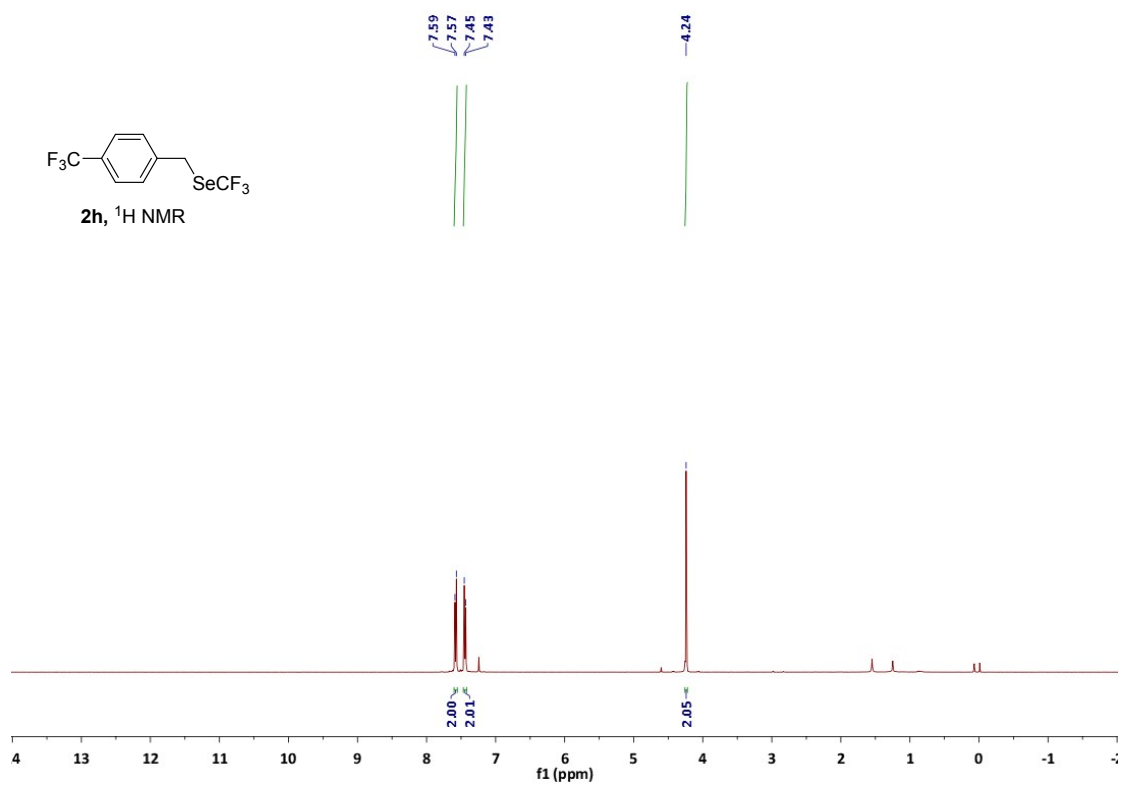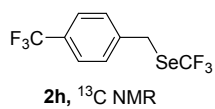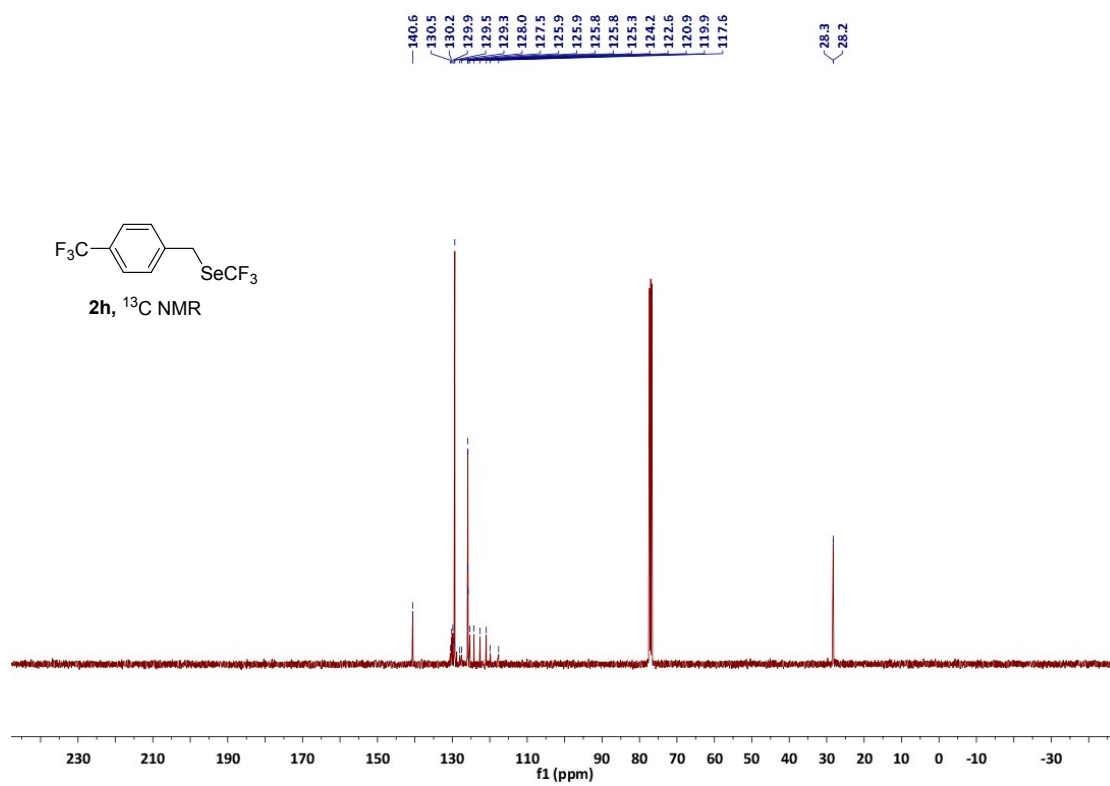

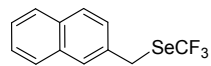

2i,  $^{19}\text{F}$  NMR

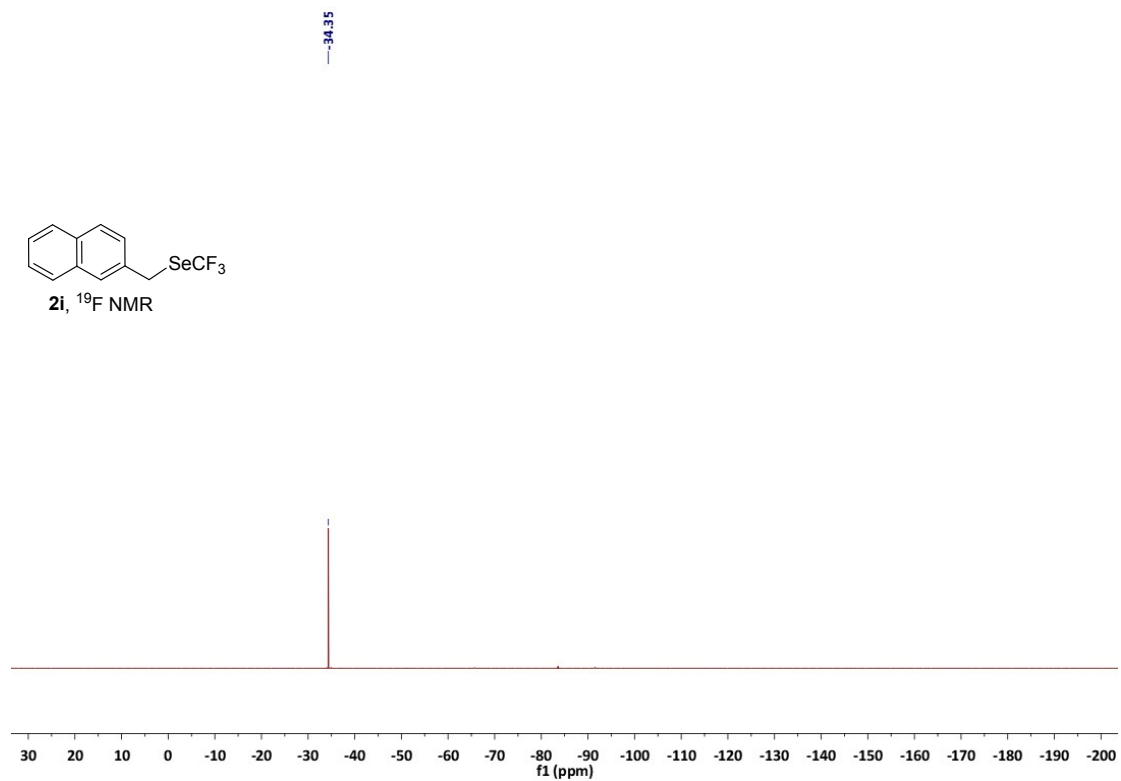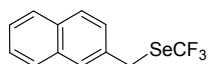

2i,  $^1\text{H}$  NMR

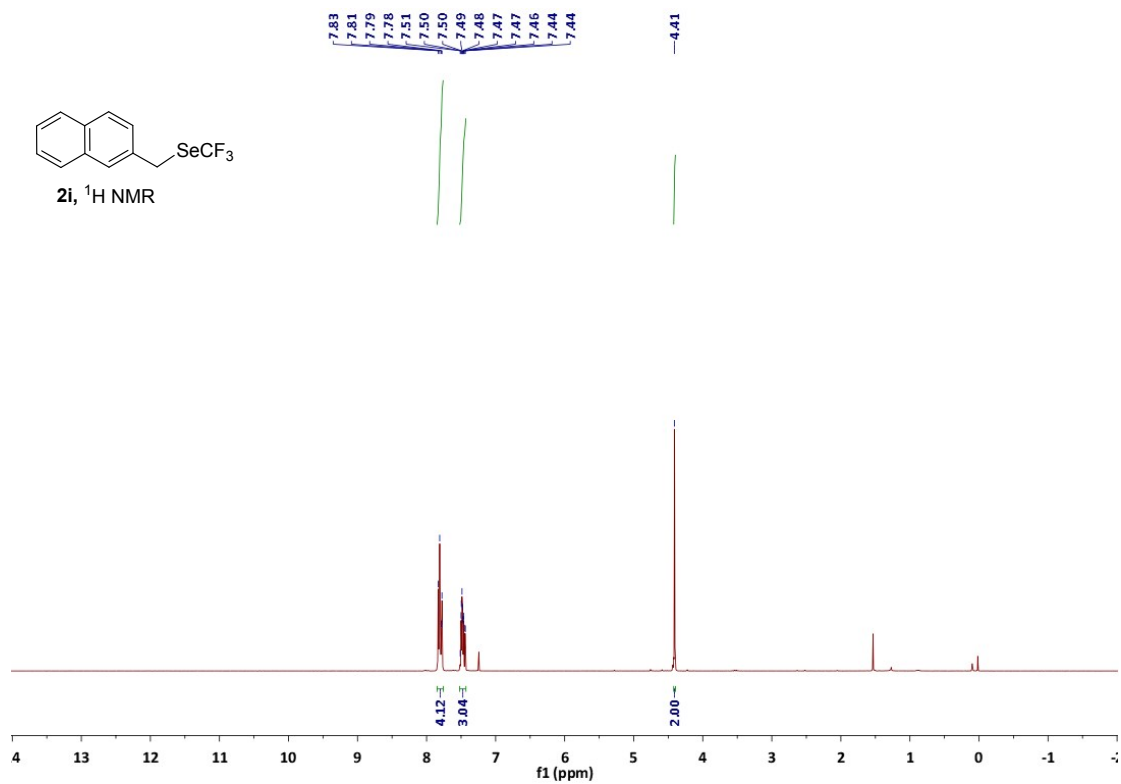

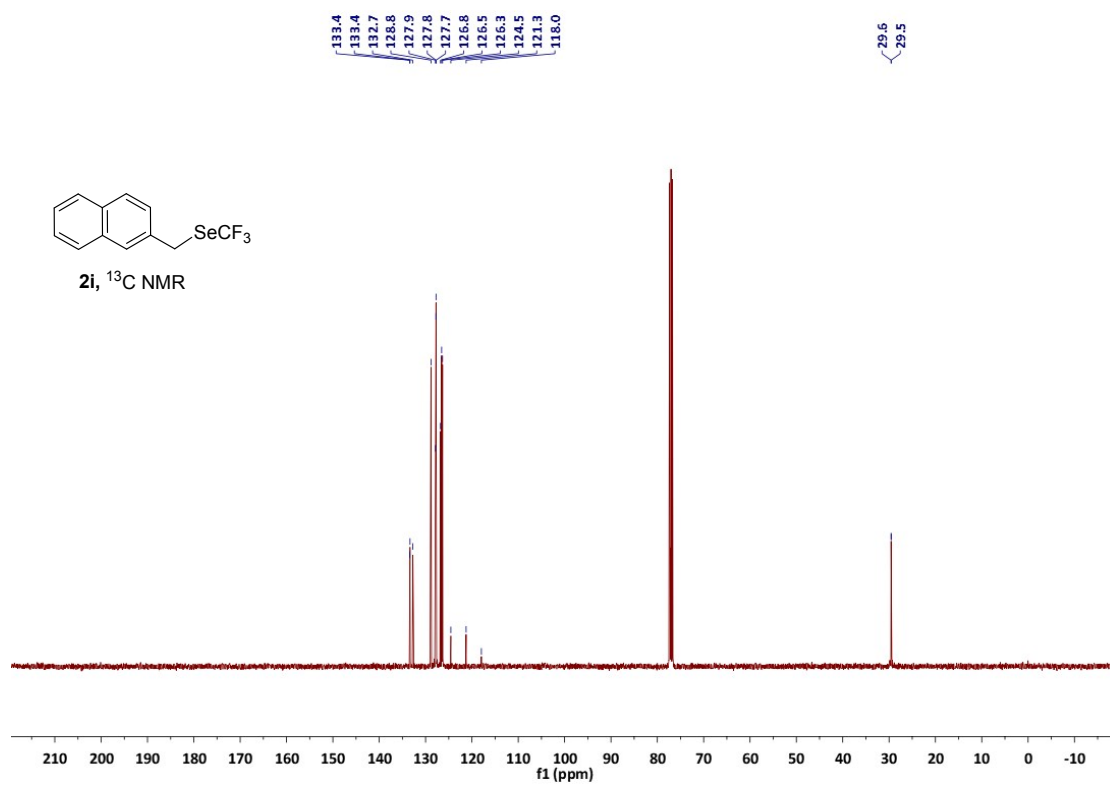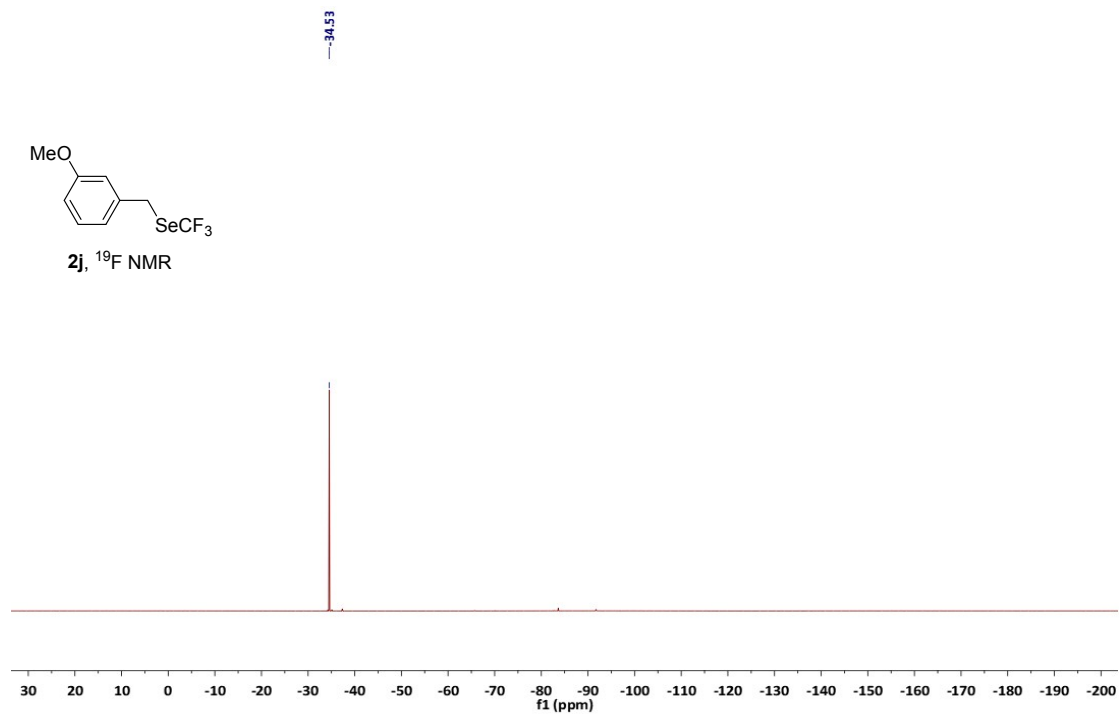

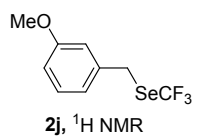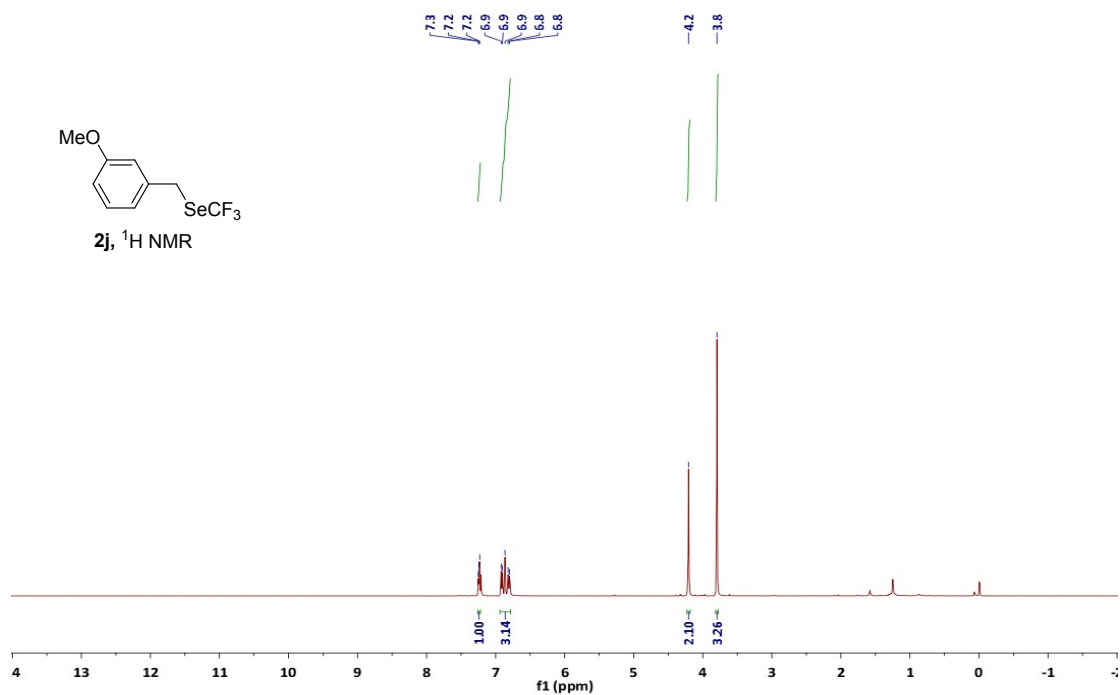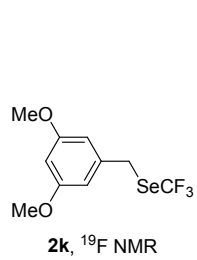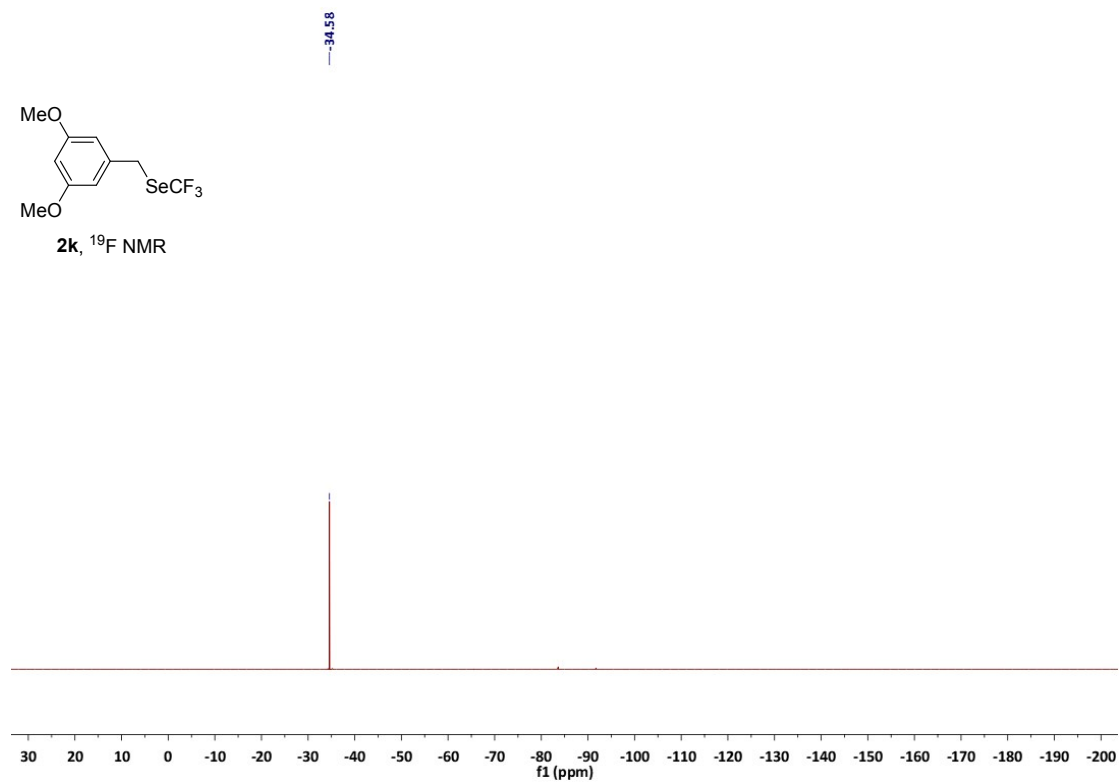



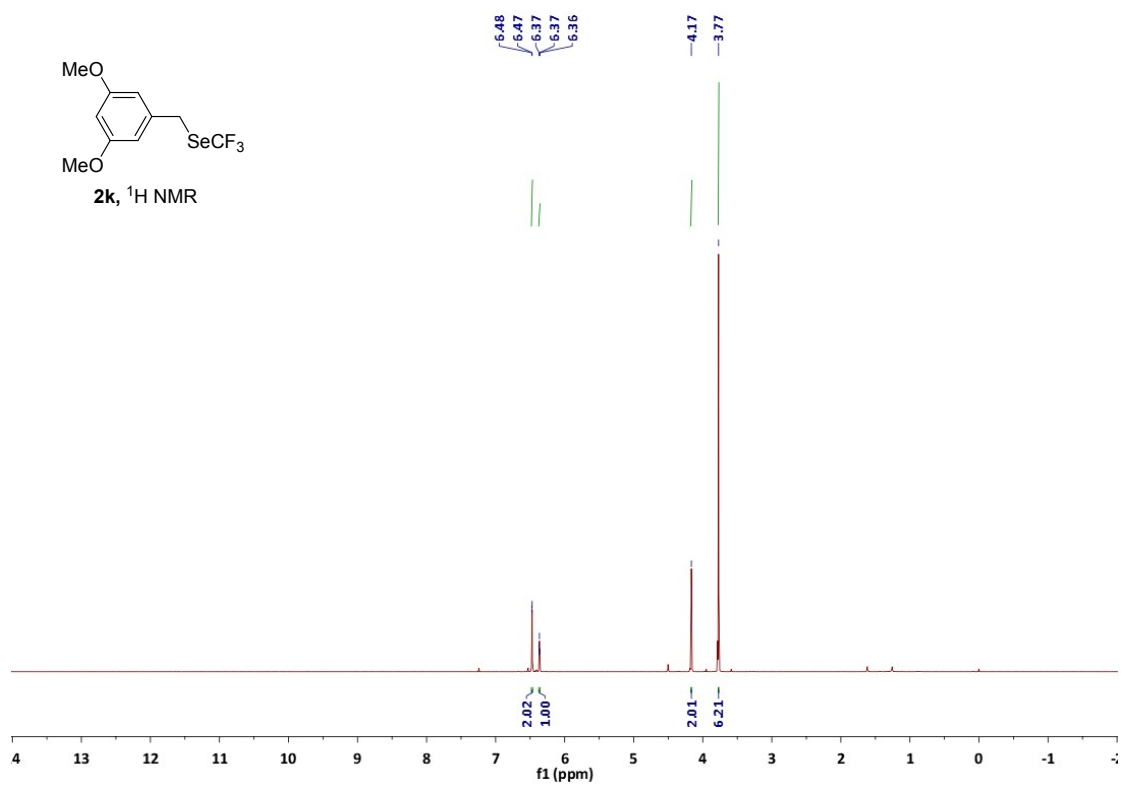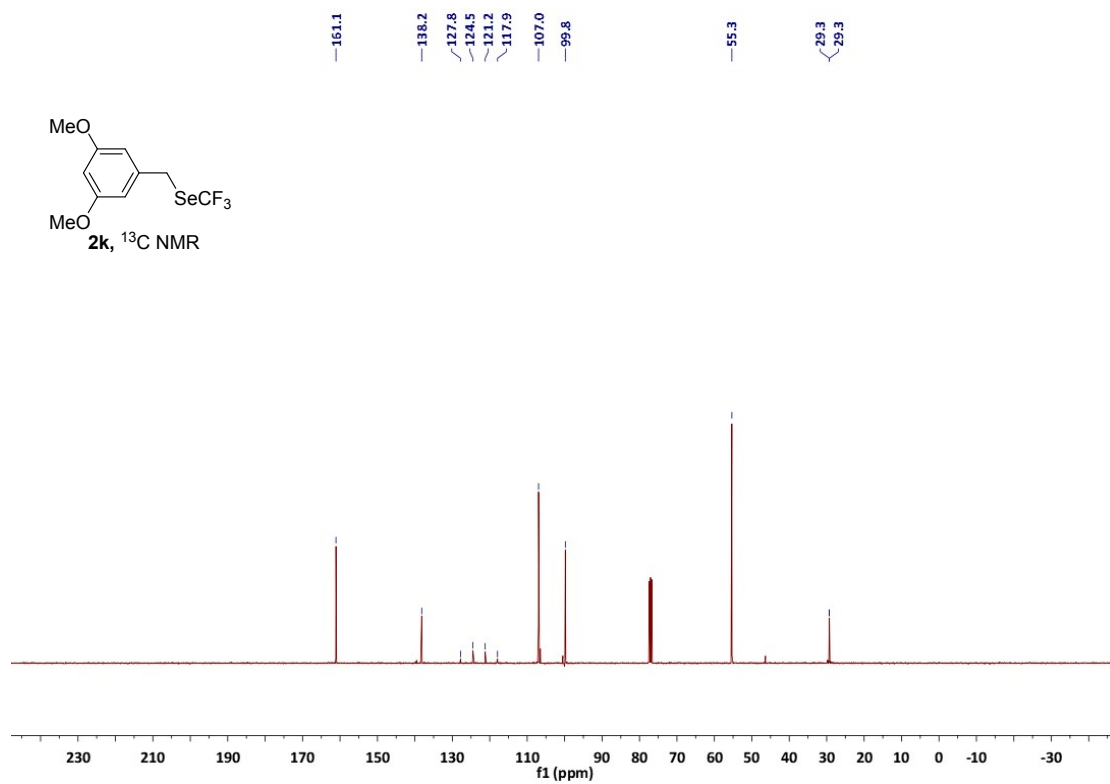

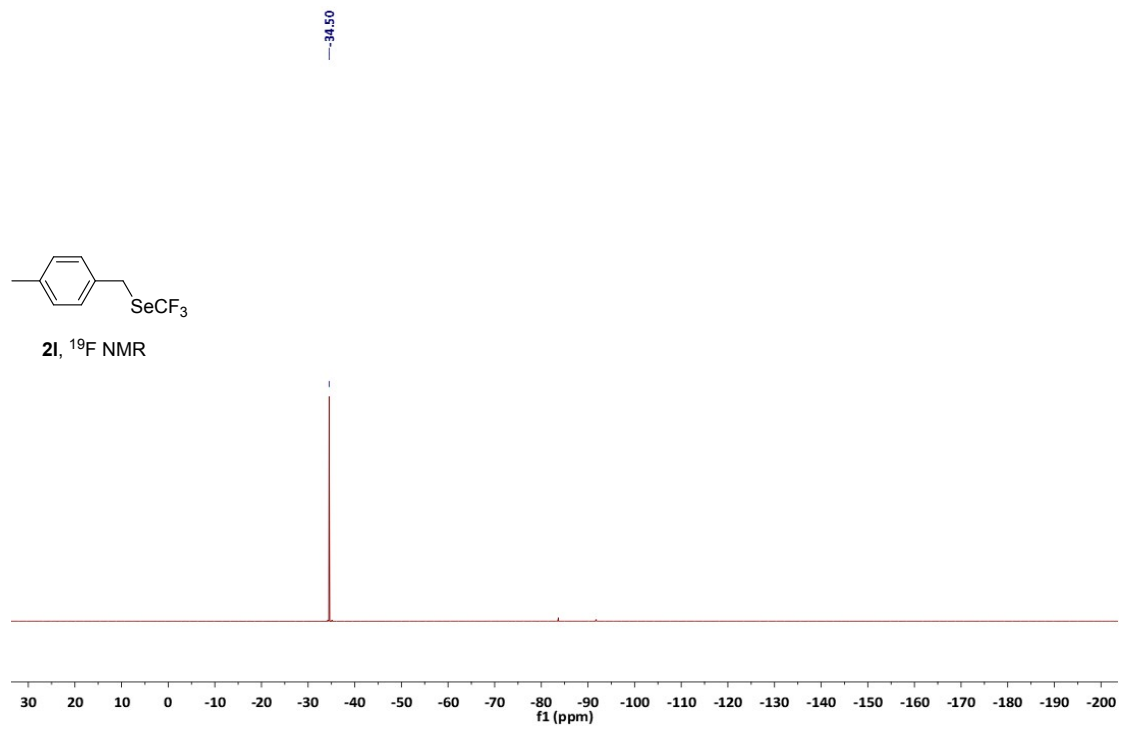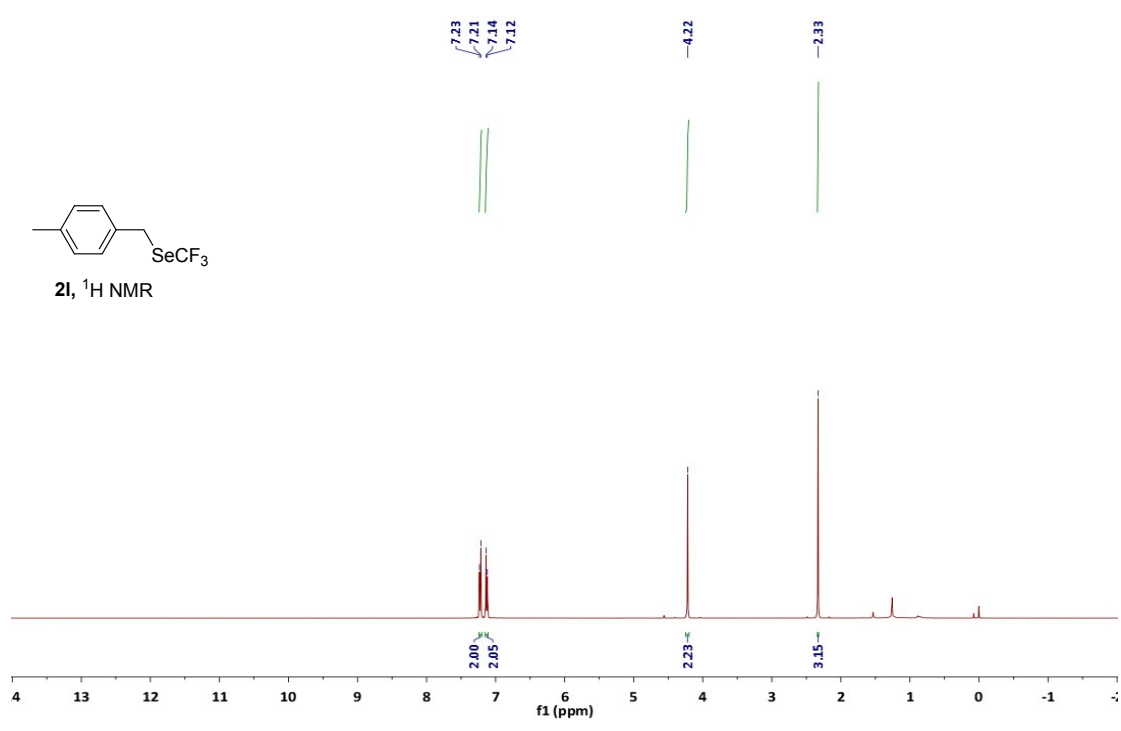

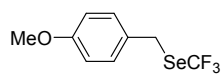

2m,  $^{19}\text{F}$  NMR

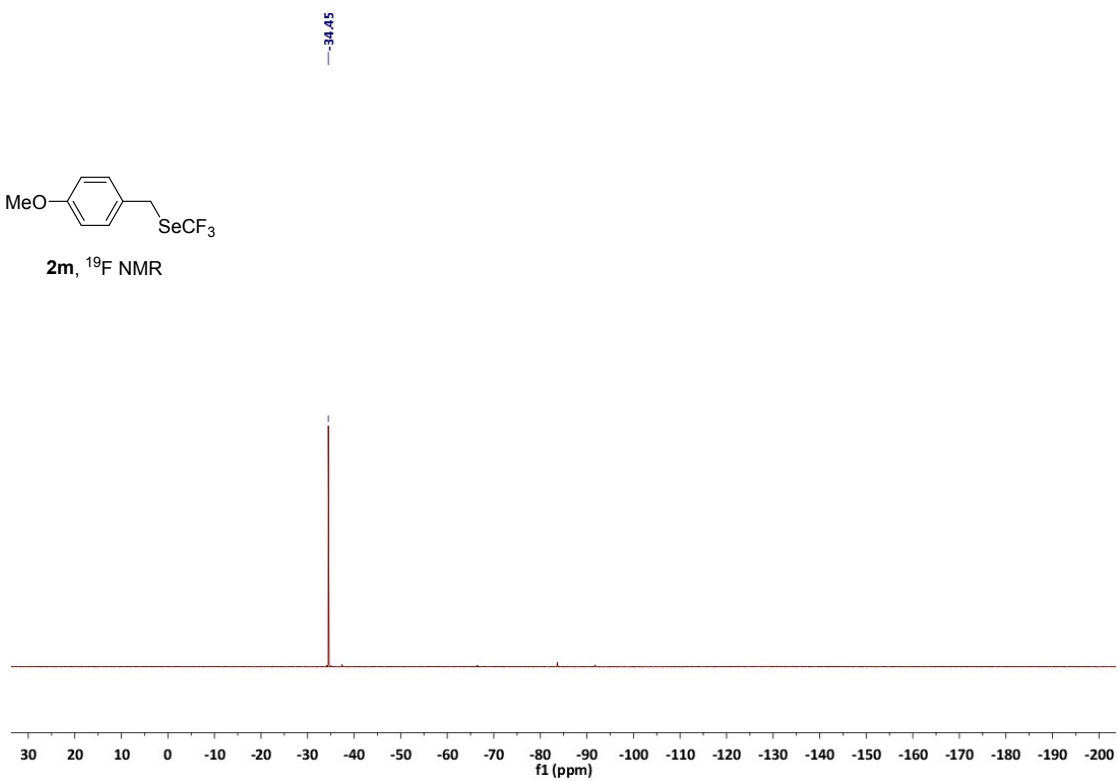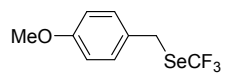

2m,  $^1\text{H}$  NMR

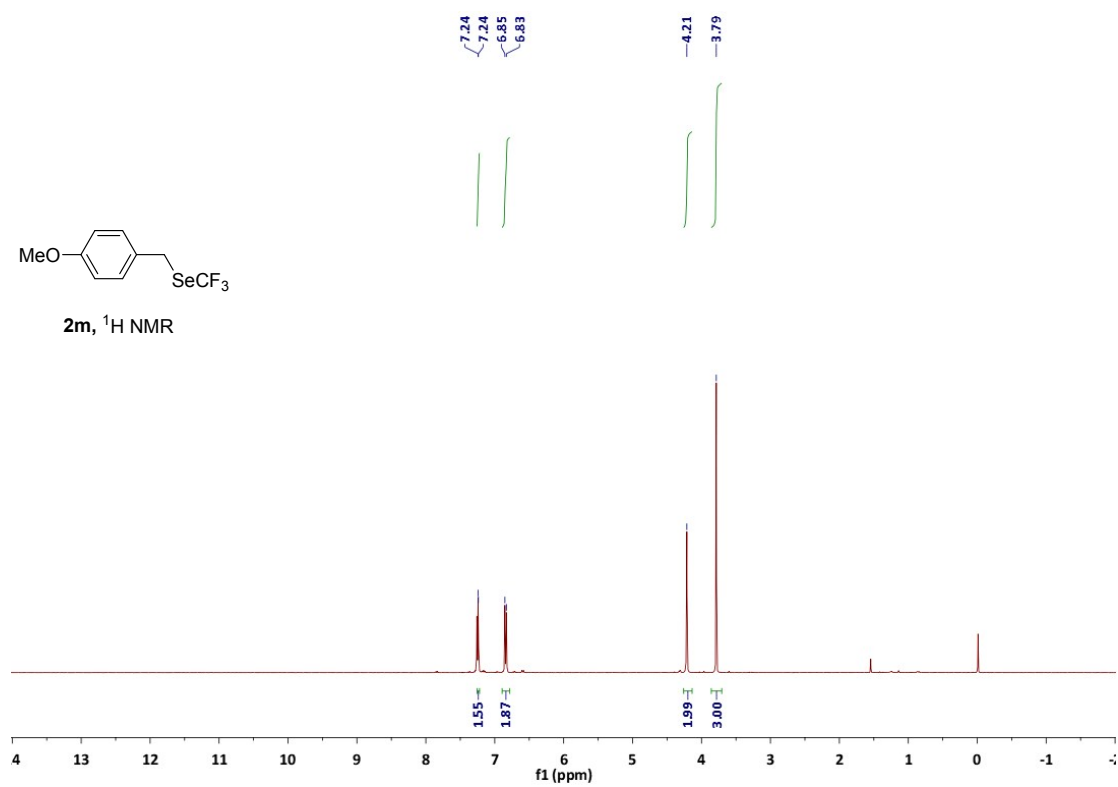

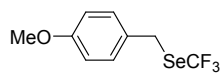

**2m**,  $^{13}\text{C}$  NMR

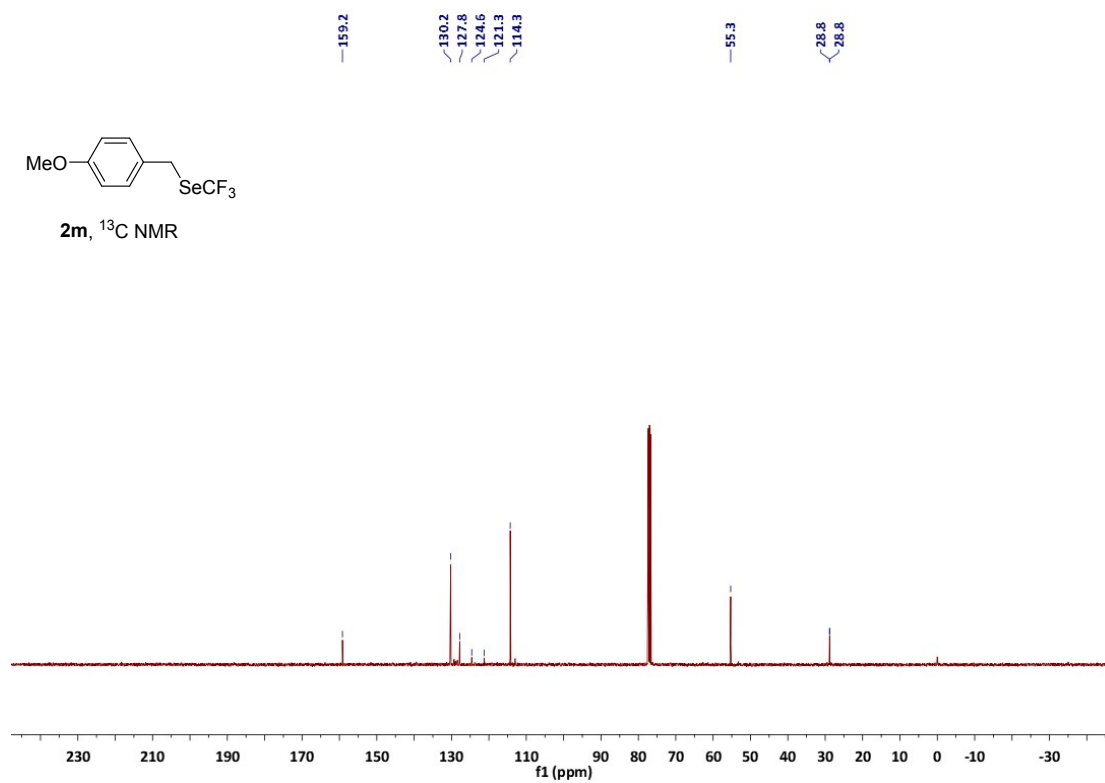

Supplement: c8cc09719d1.pdf [file c8cc09719d1.pdf]
